# Supplementary figures and images for: Genome- and Exome-Wide Association Studies Revealed Candidate Genes Associated with DaTscan Imaging Features
Source: Hindawi journal article supplement (doi:10.1155/2023/2893662), 2023-08-23

Manhattan plot of left anterior putamen DaTscan GWAS

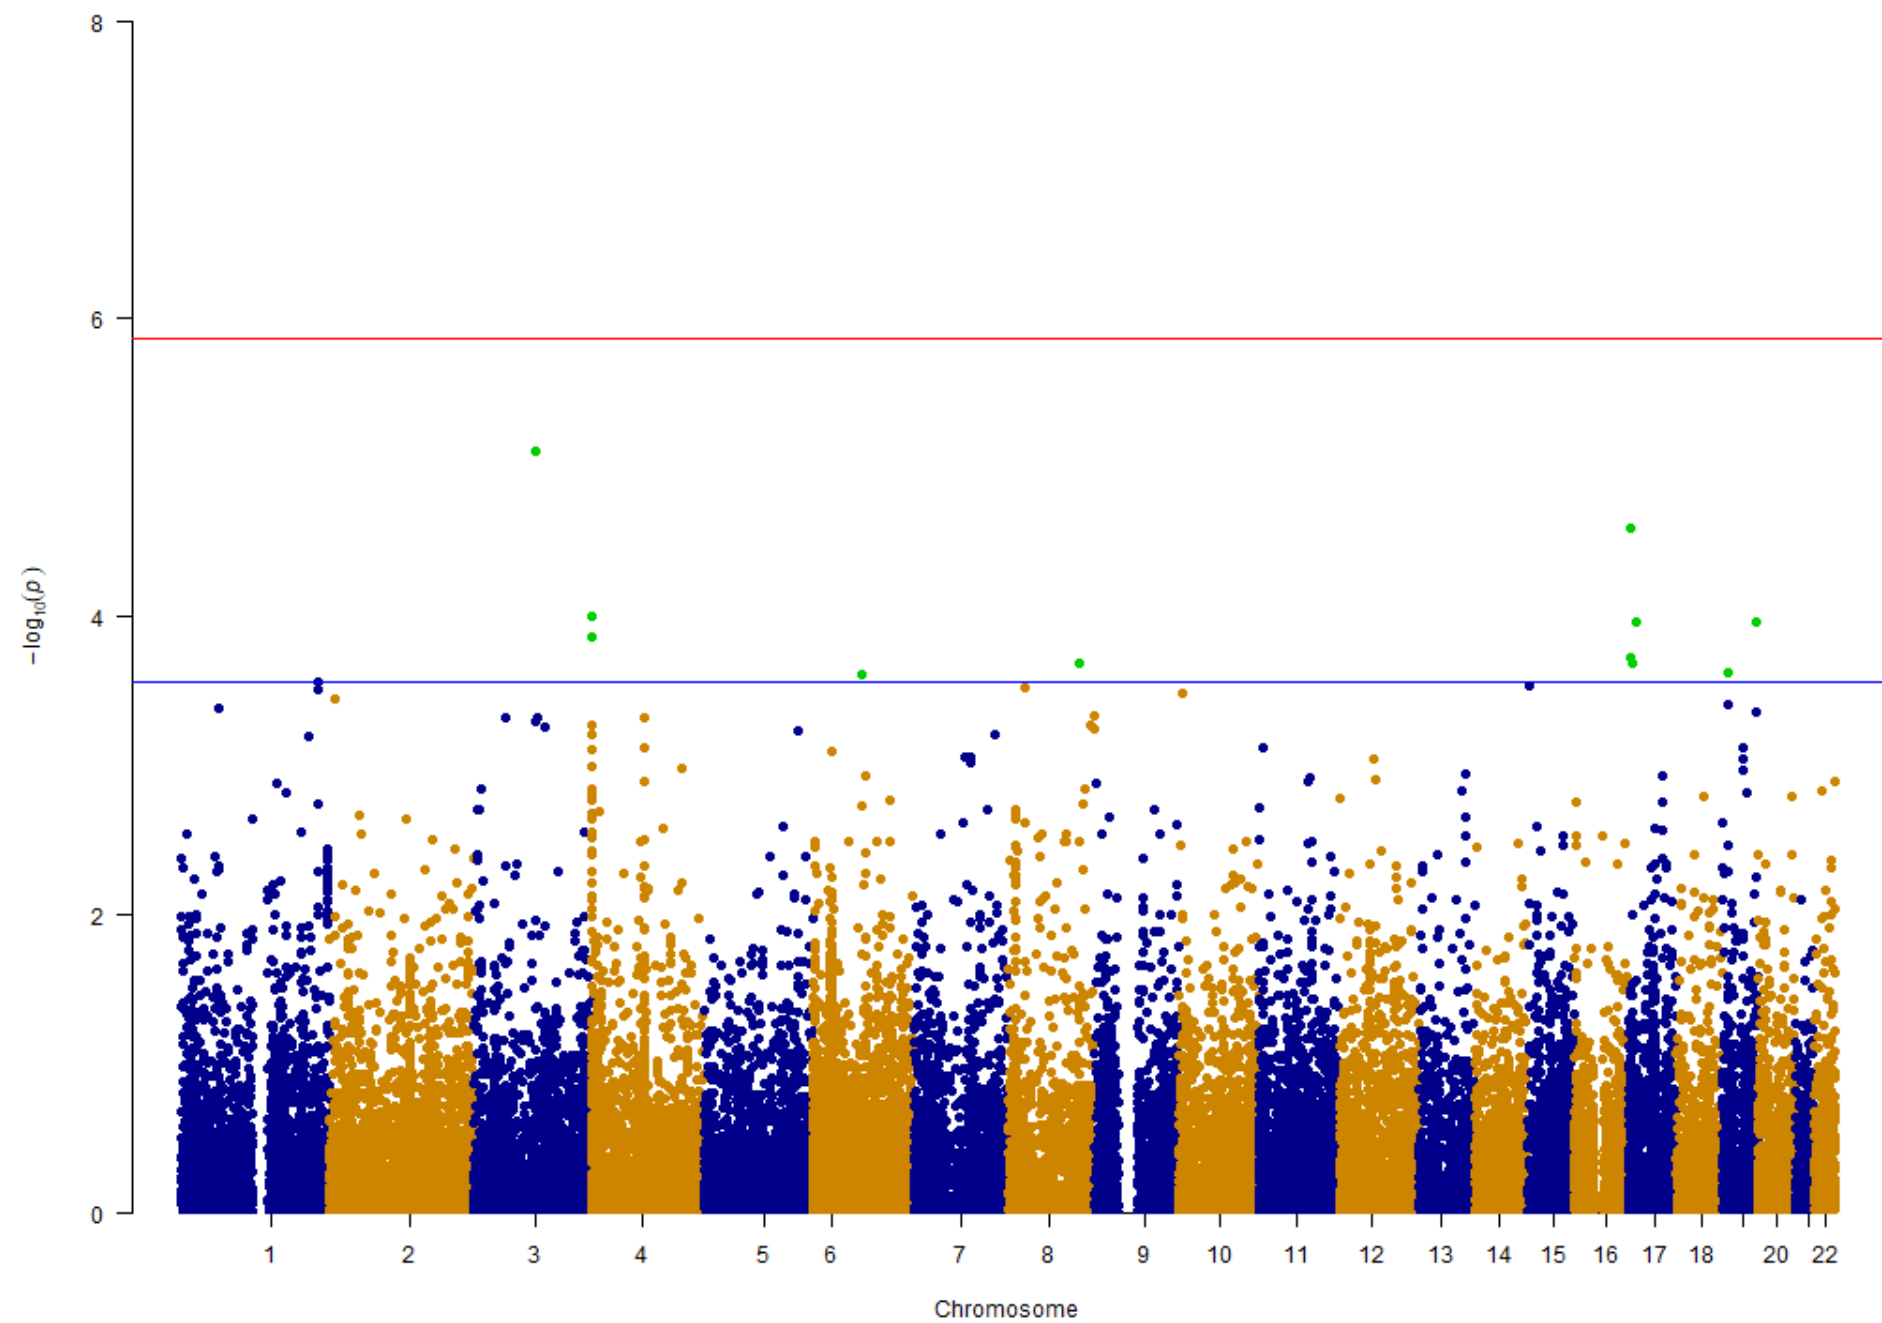

Supplement: f1 [file 2893662.f1.zip]

Manhattan plot of right putamen DaTscan EWAS

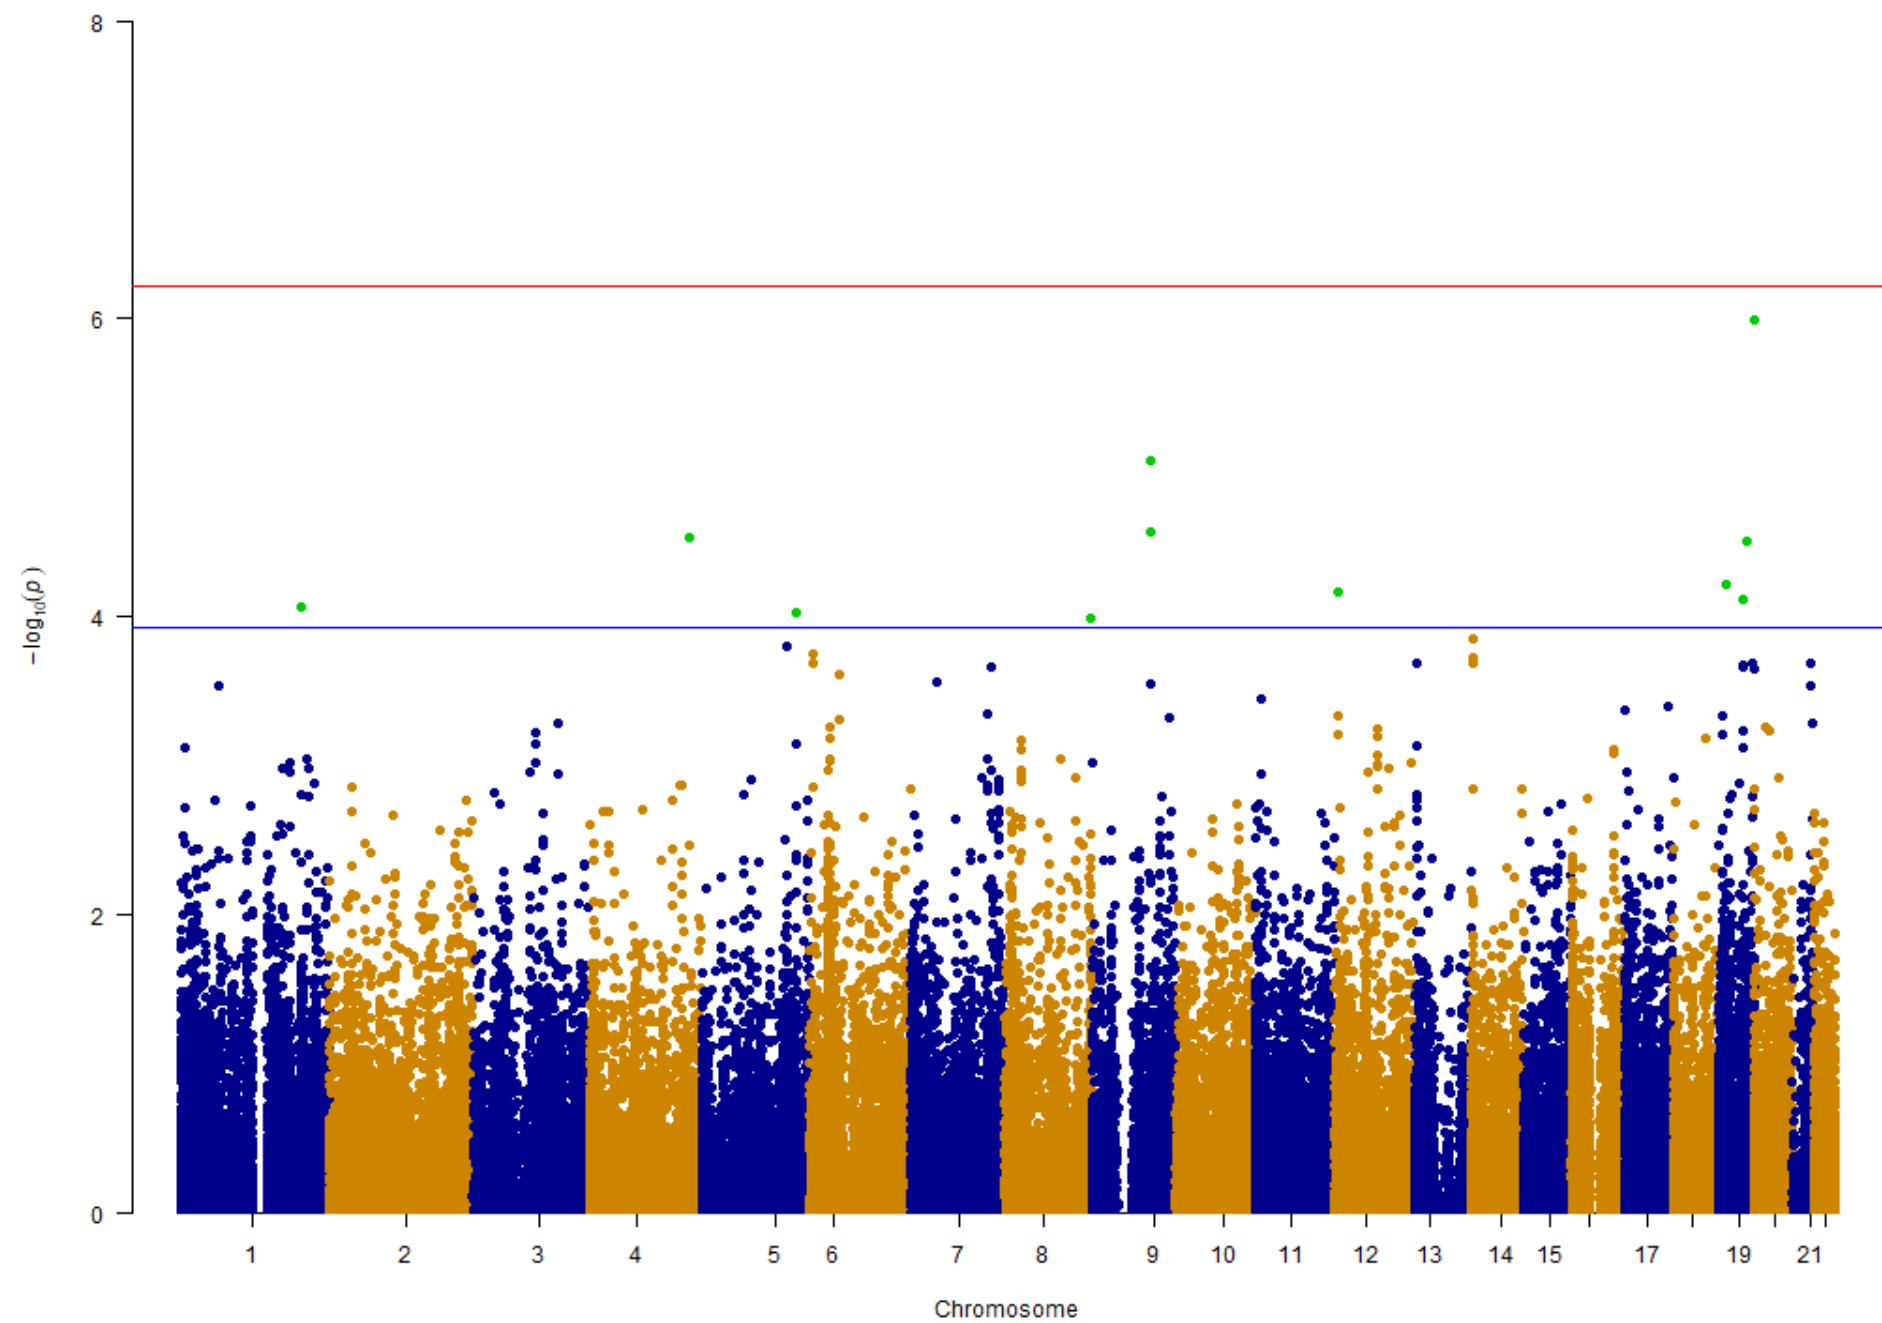

Supplement: f1 [file 2893662.f1.zip]

Manhattan plot of left caudate DaTscan GWAS

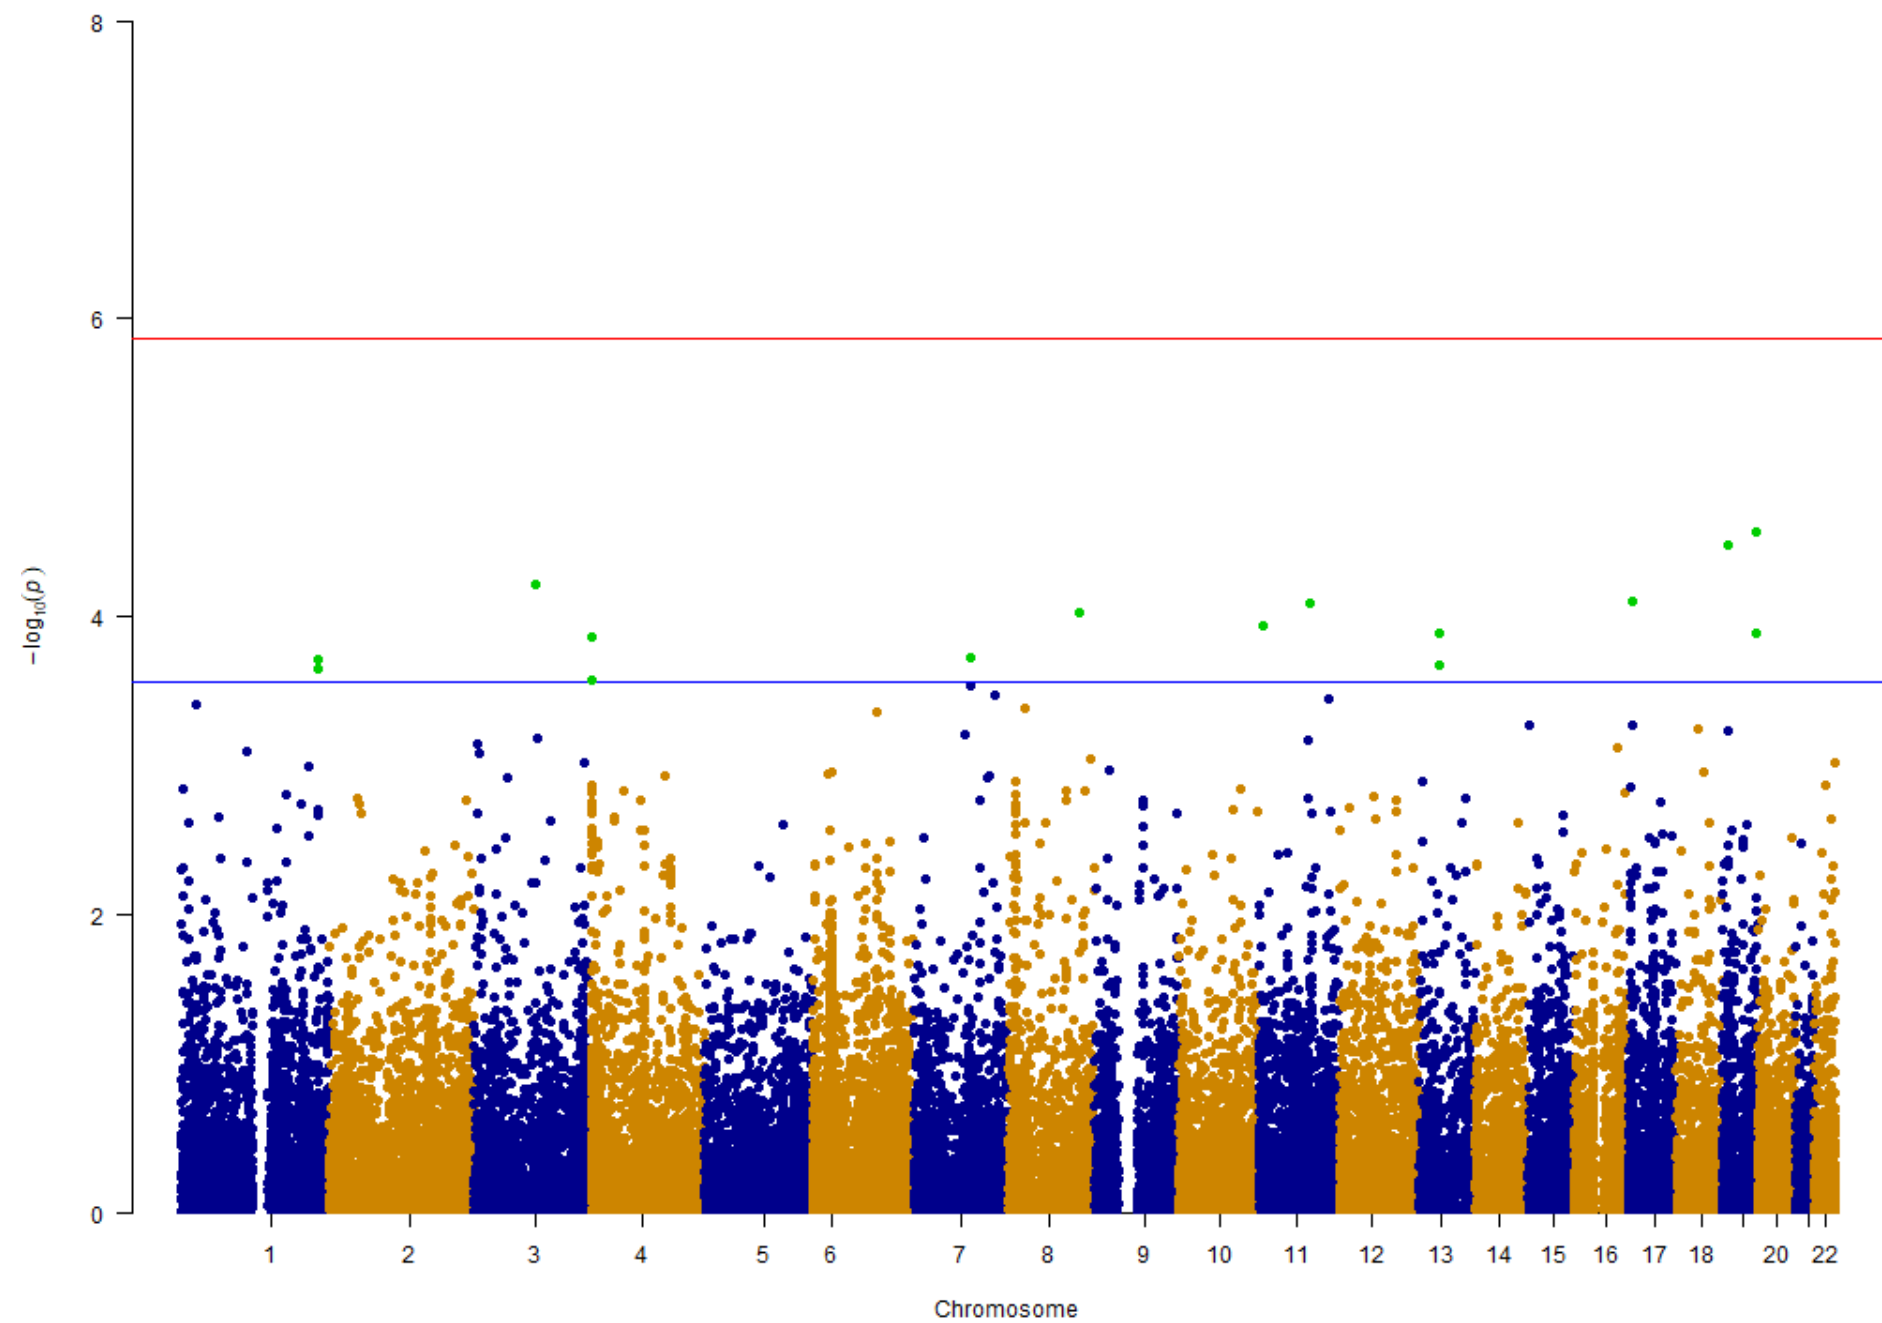

Supplement: f1 [file 2893662.f1.zip]

Manhattan plot of right anterior putamen DaTscan GWAS

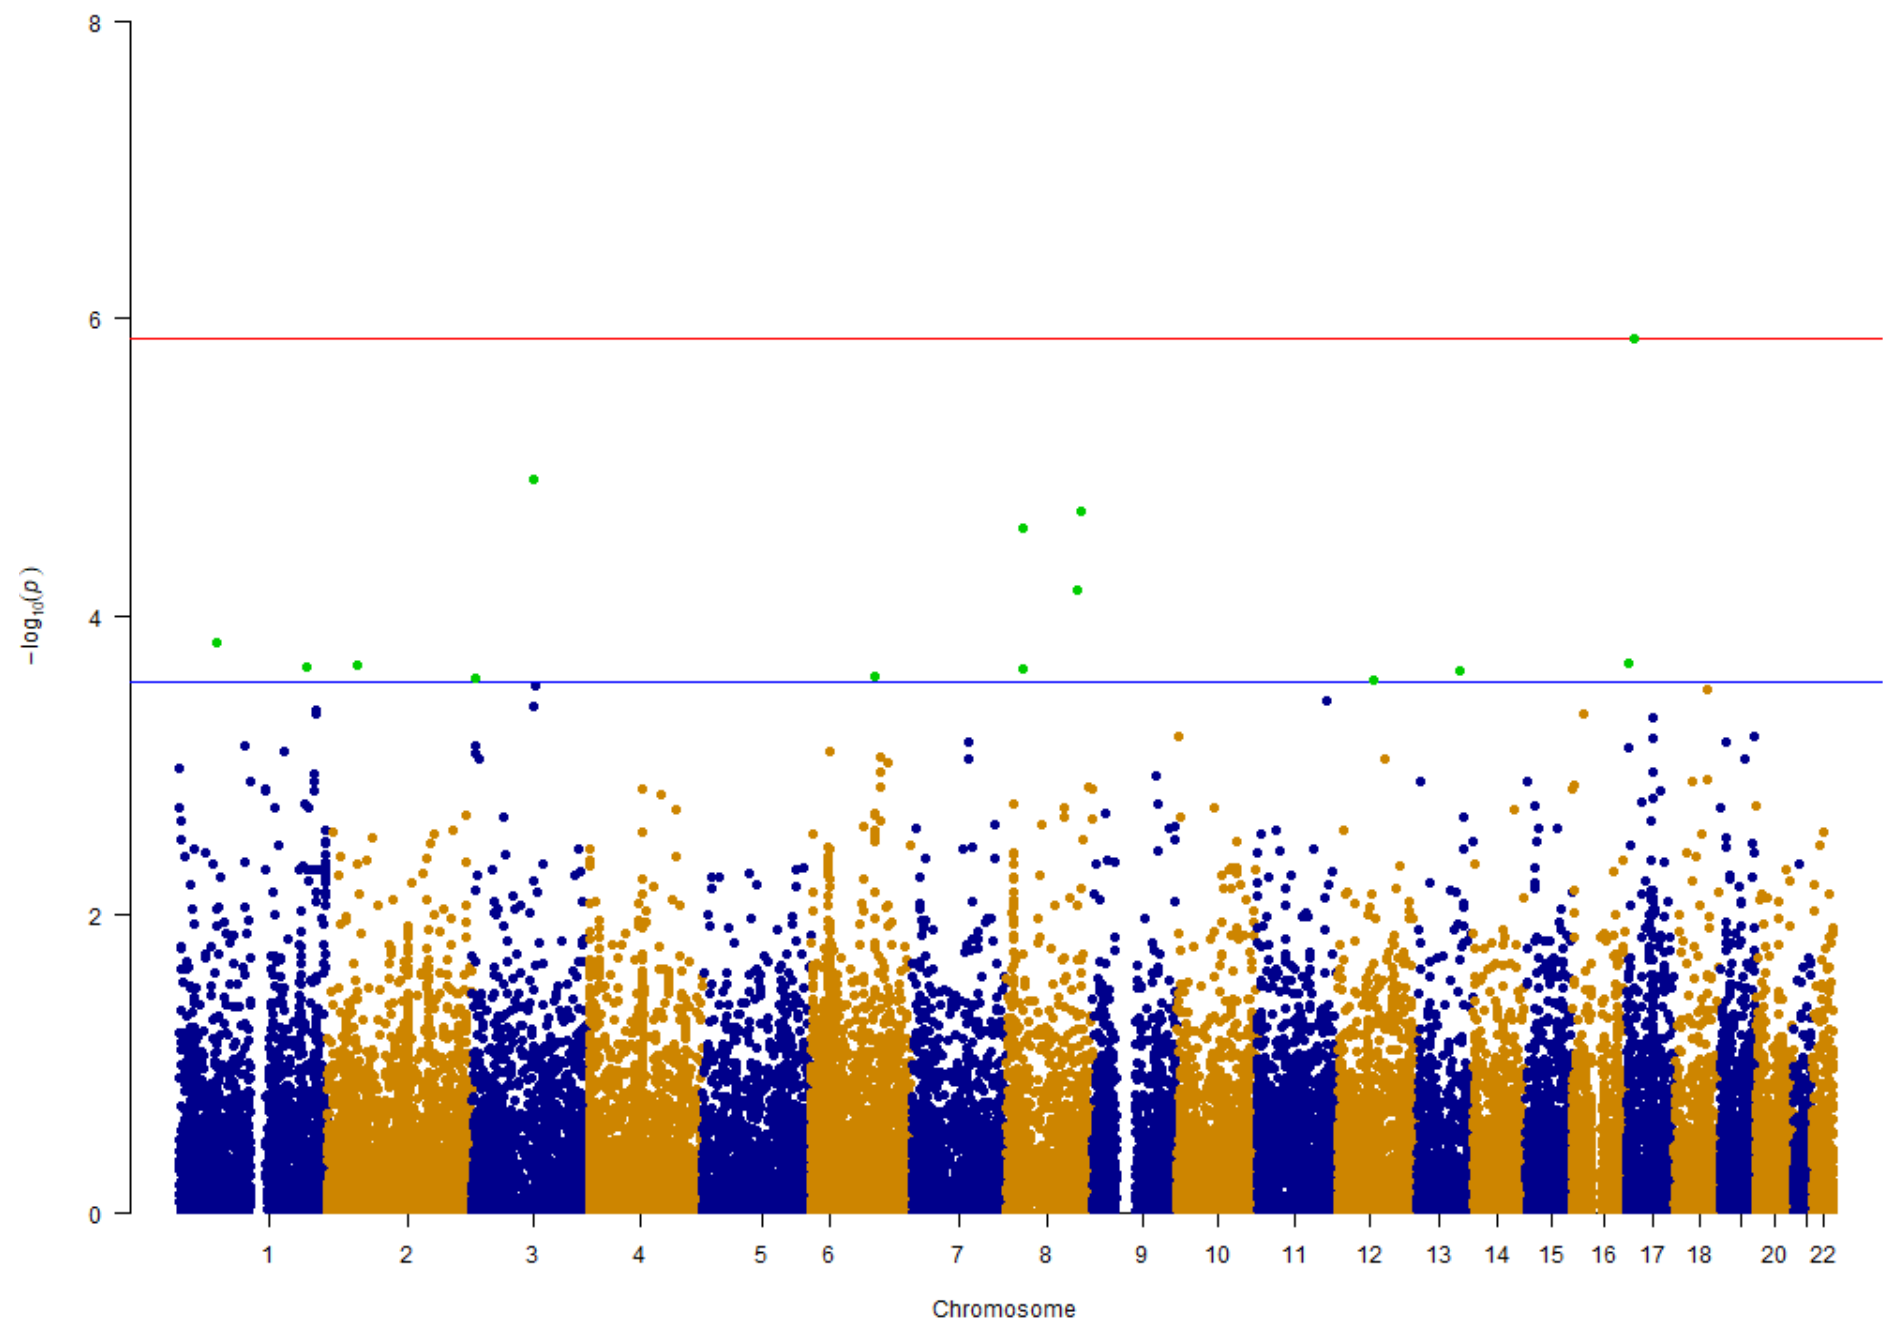

Supplement: f1 [file 2893662.f1.zip]

Q-Q plot of right putamen DaTscan GWAS

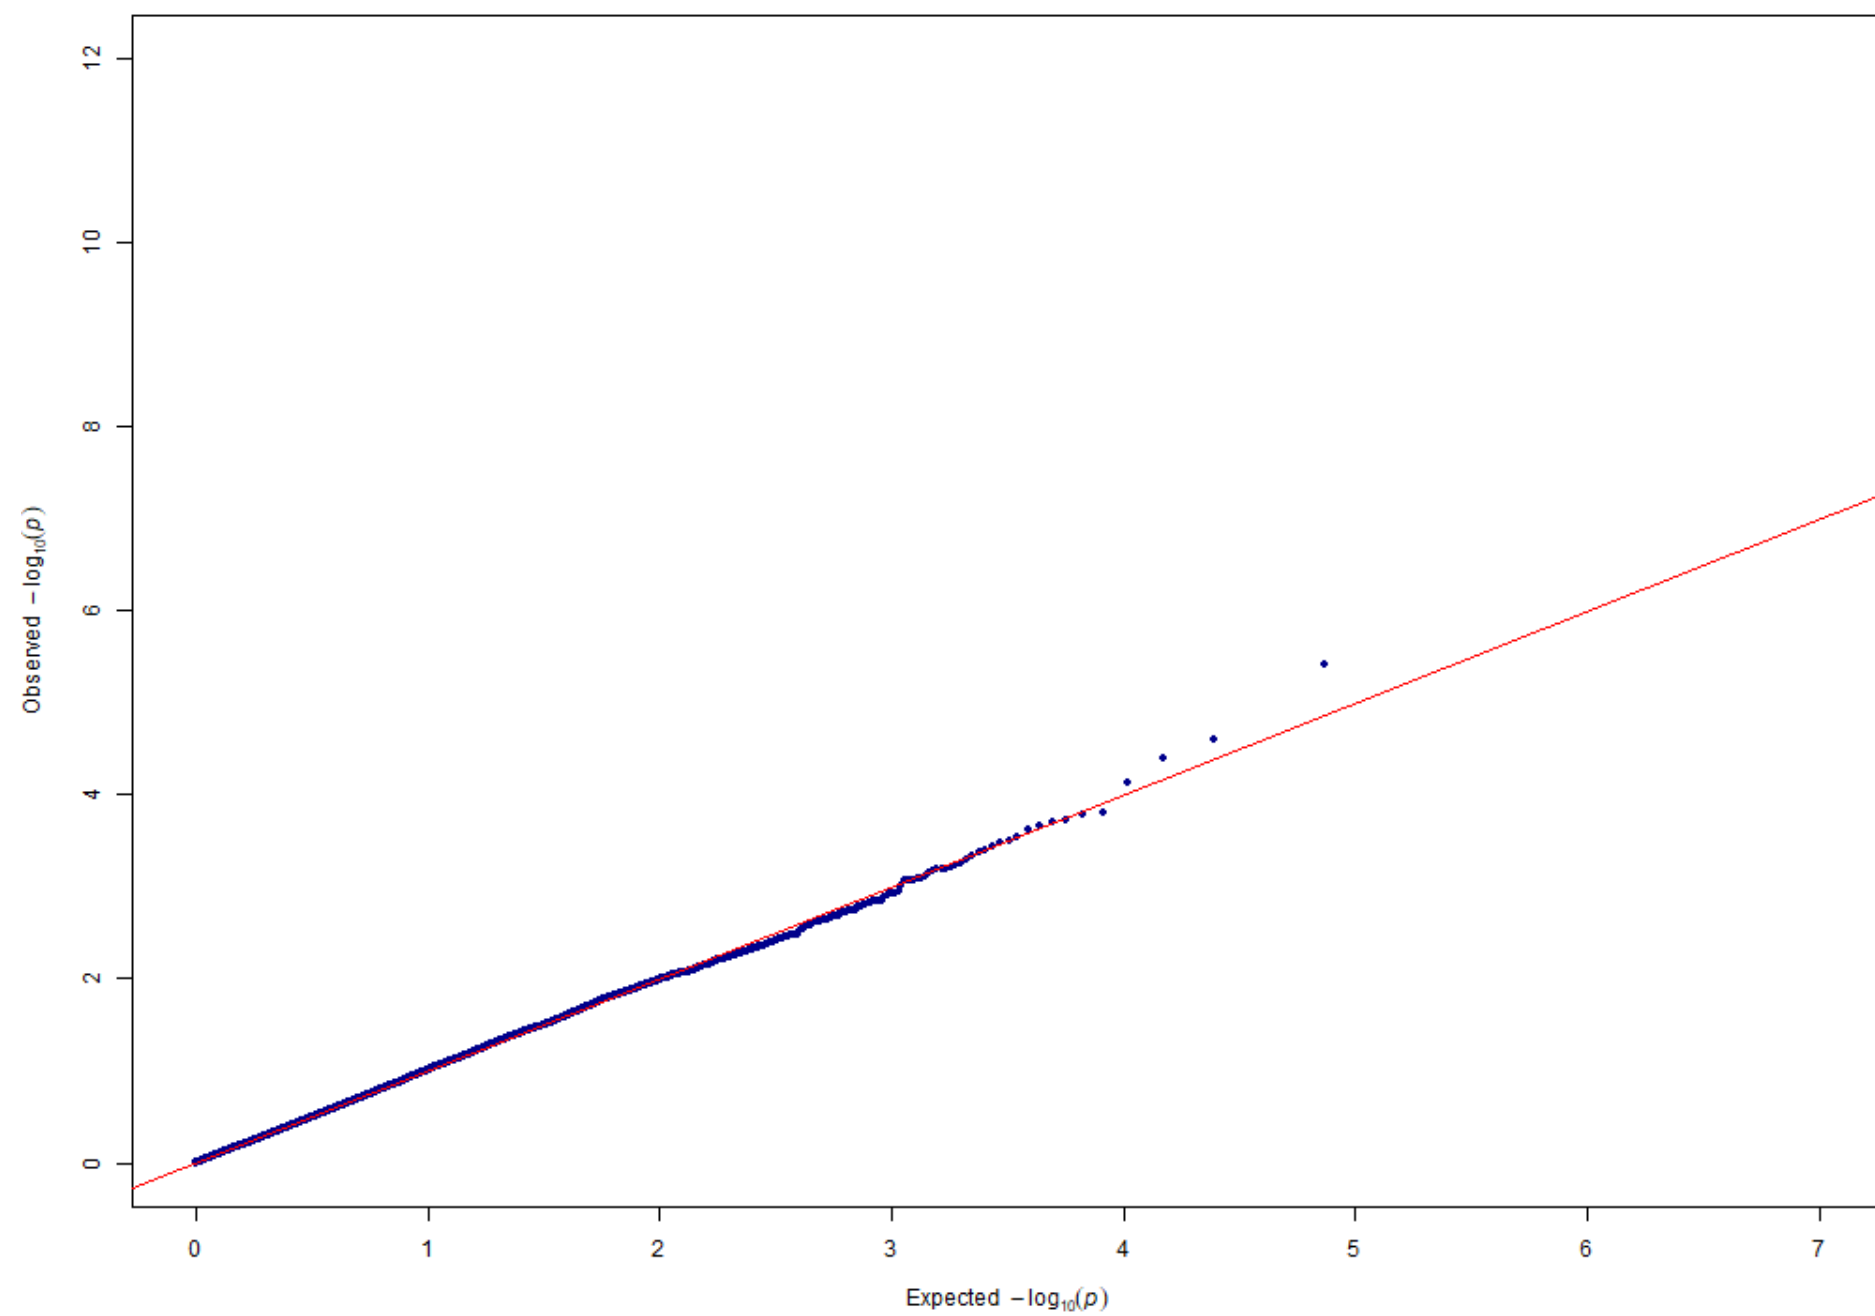

Supplement: f1 [file 2893662.f1.zip]

Manhattan plot of left caudate DaTscan EWAS

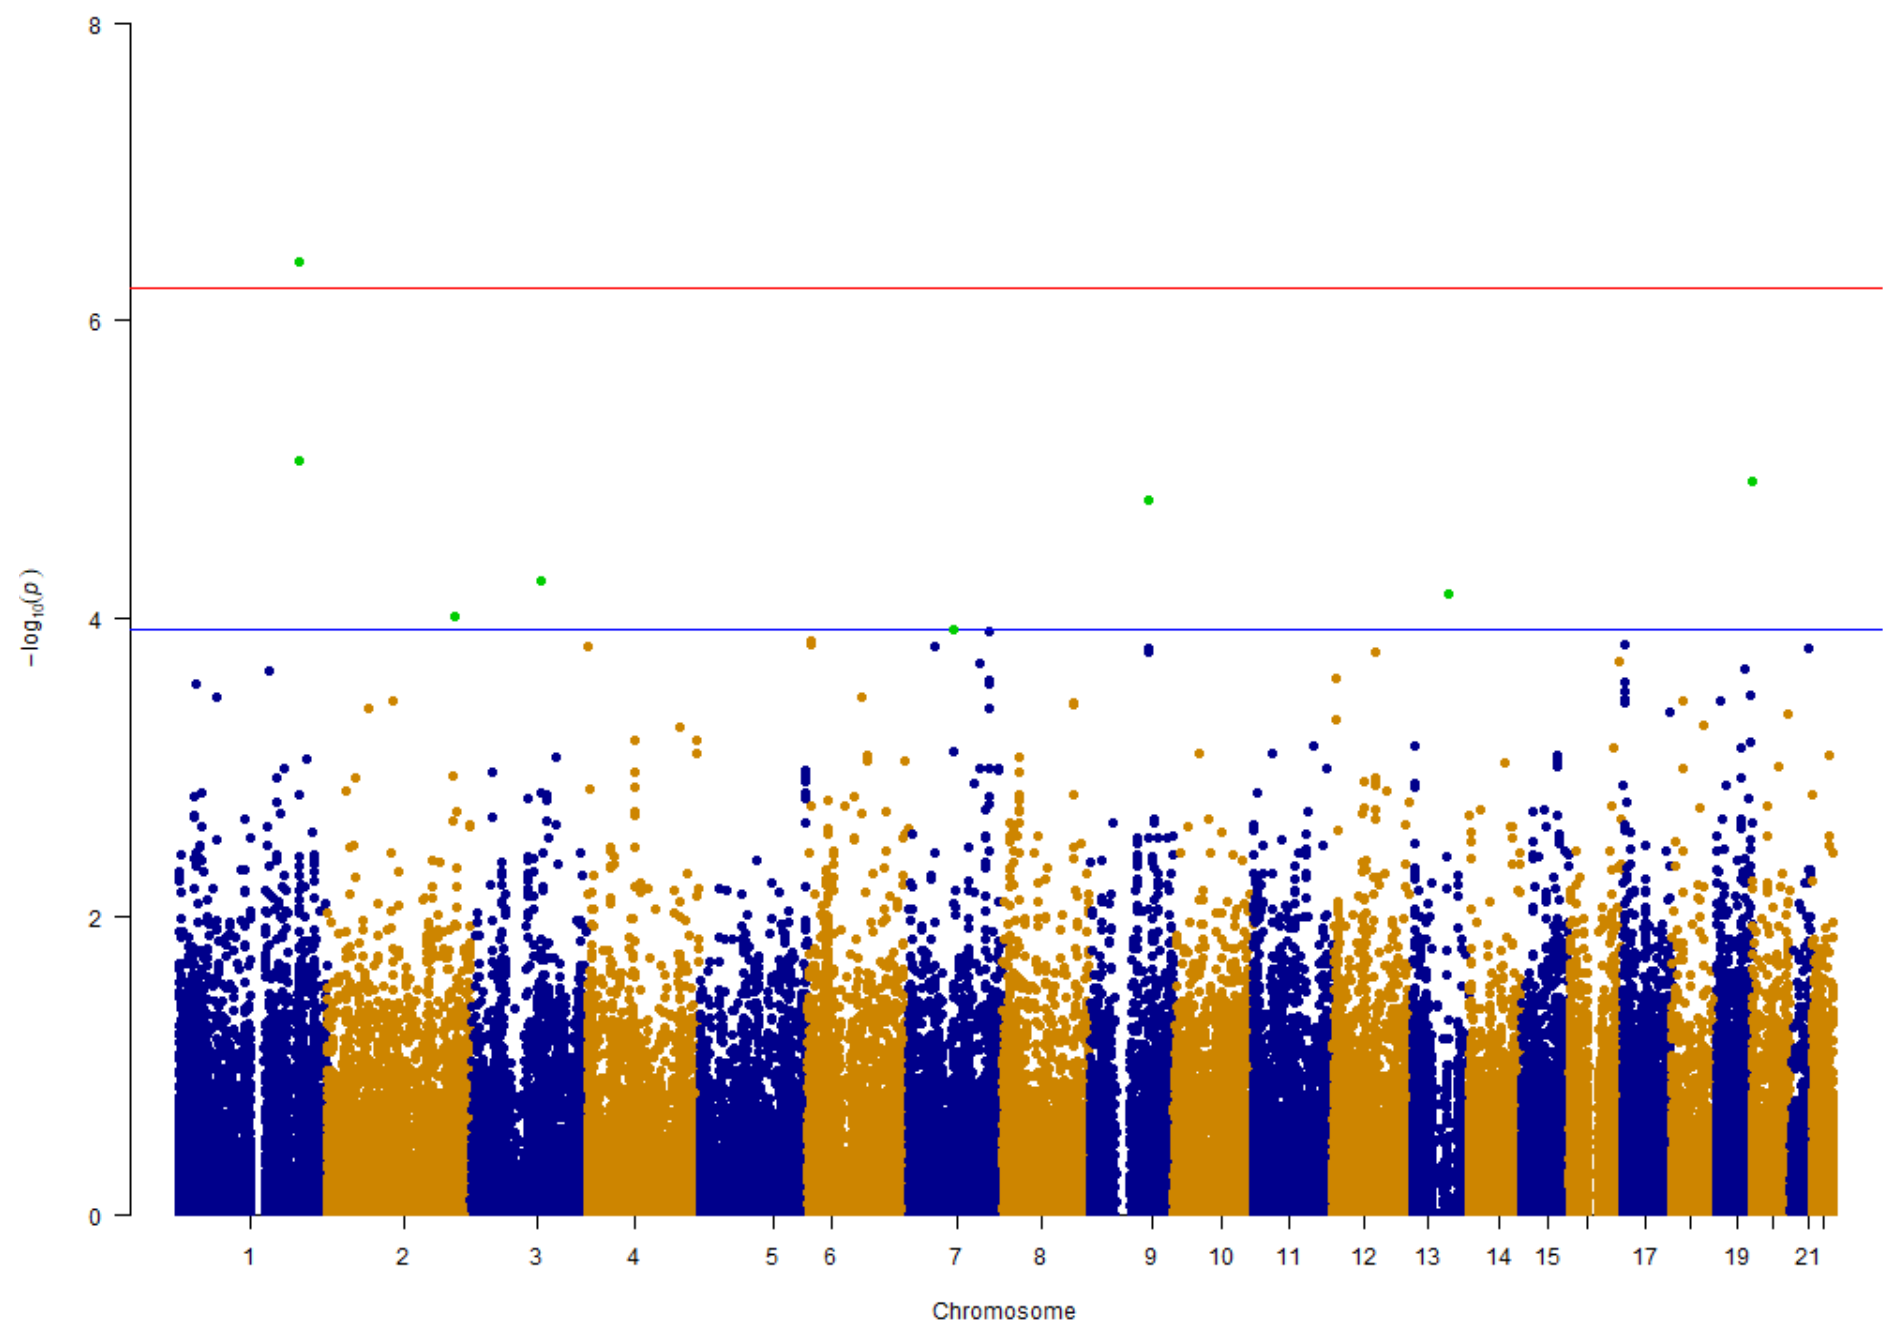

Supplement: f1 [file 2893662.f1.zip]

Q-Q plot of left caudate DaTscan EWAS

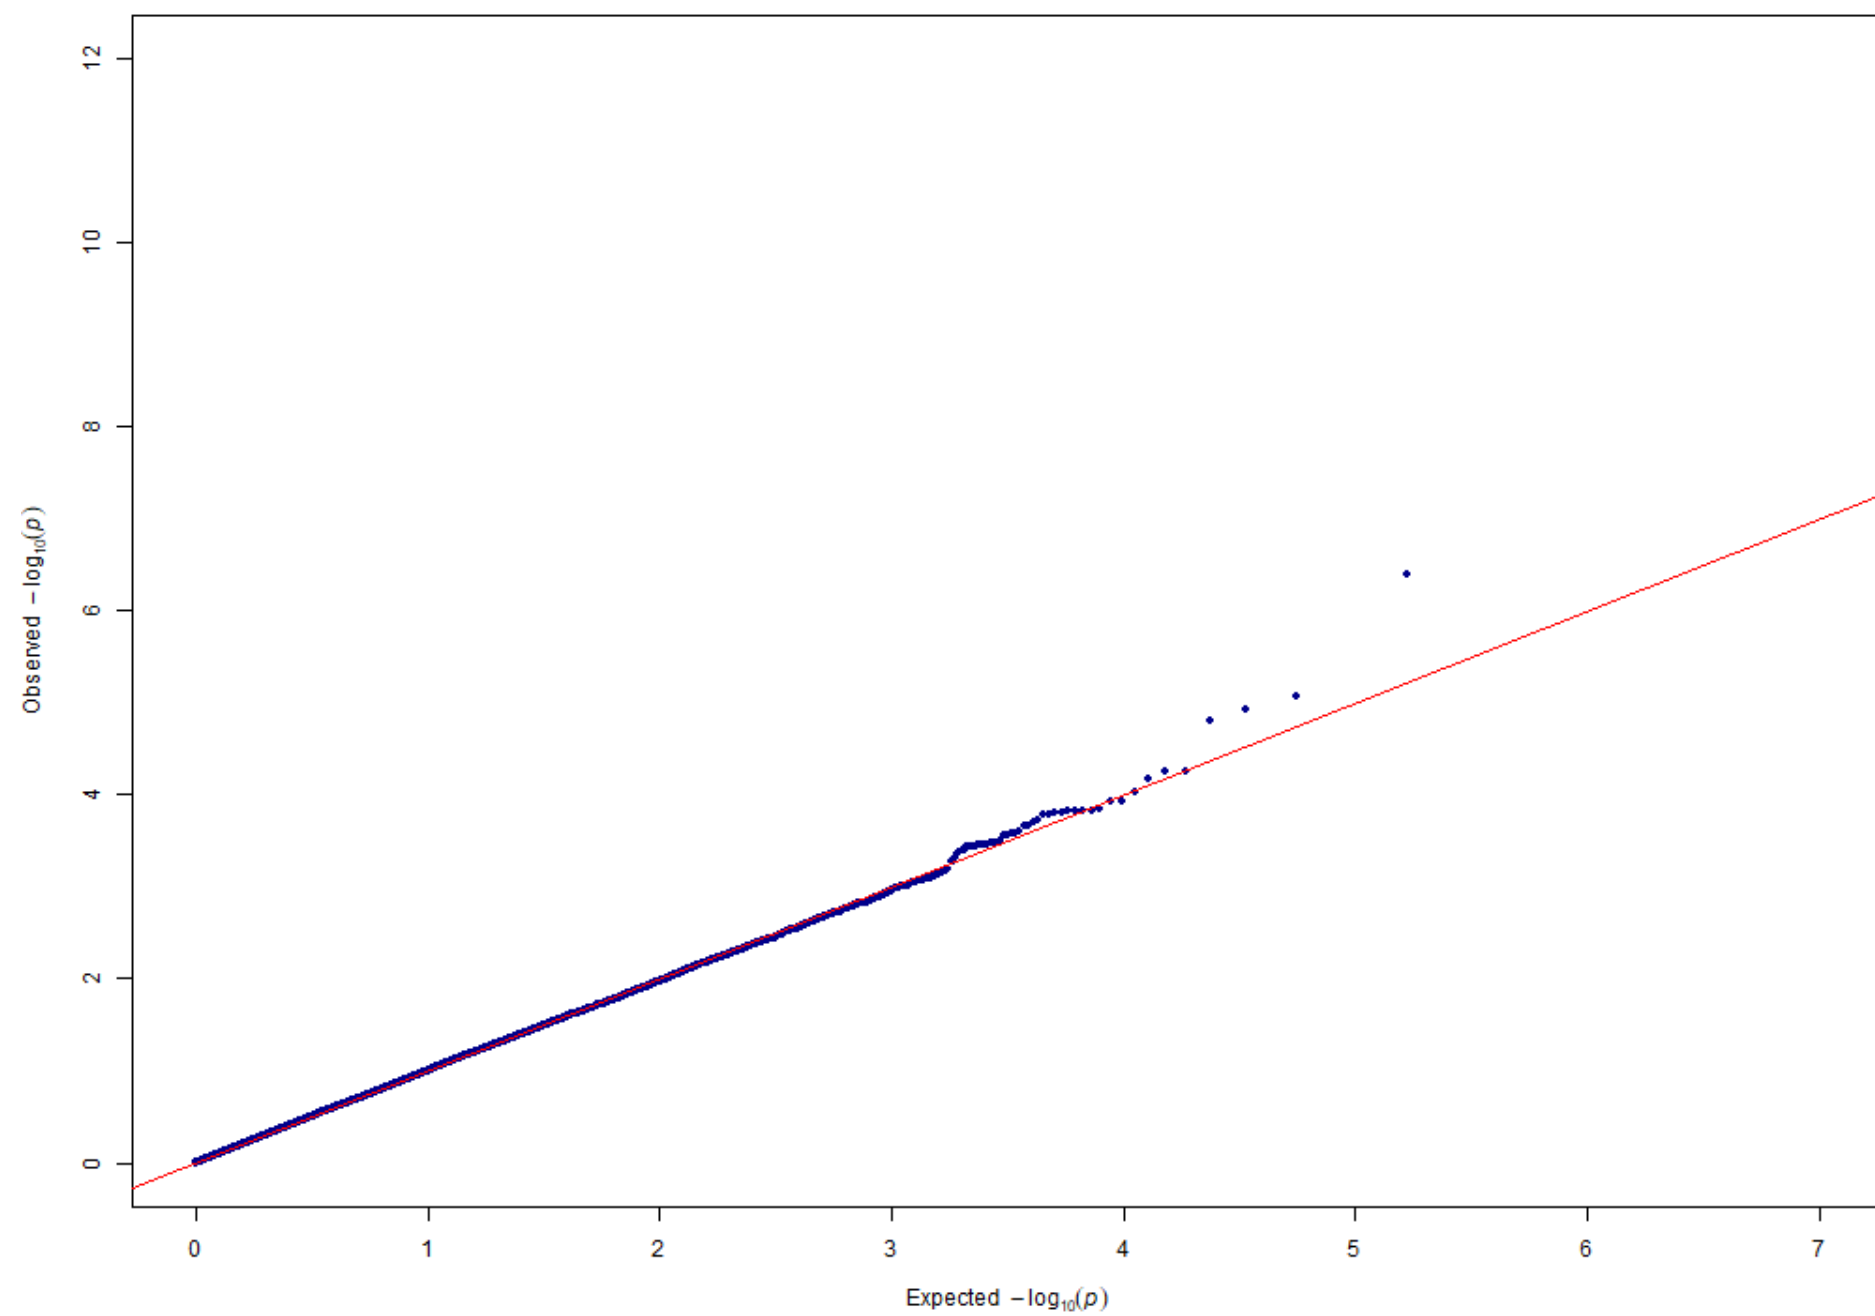

Supplement: f1 [file 2893662.f1.zip]

Manhattan plot of left putamen DaTscan EWAS

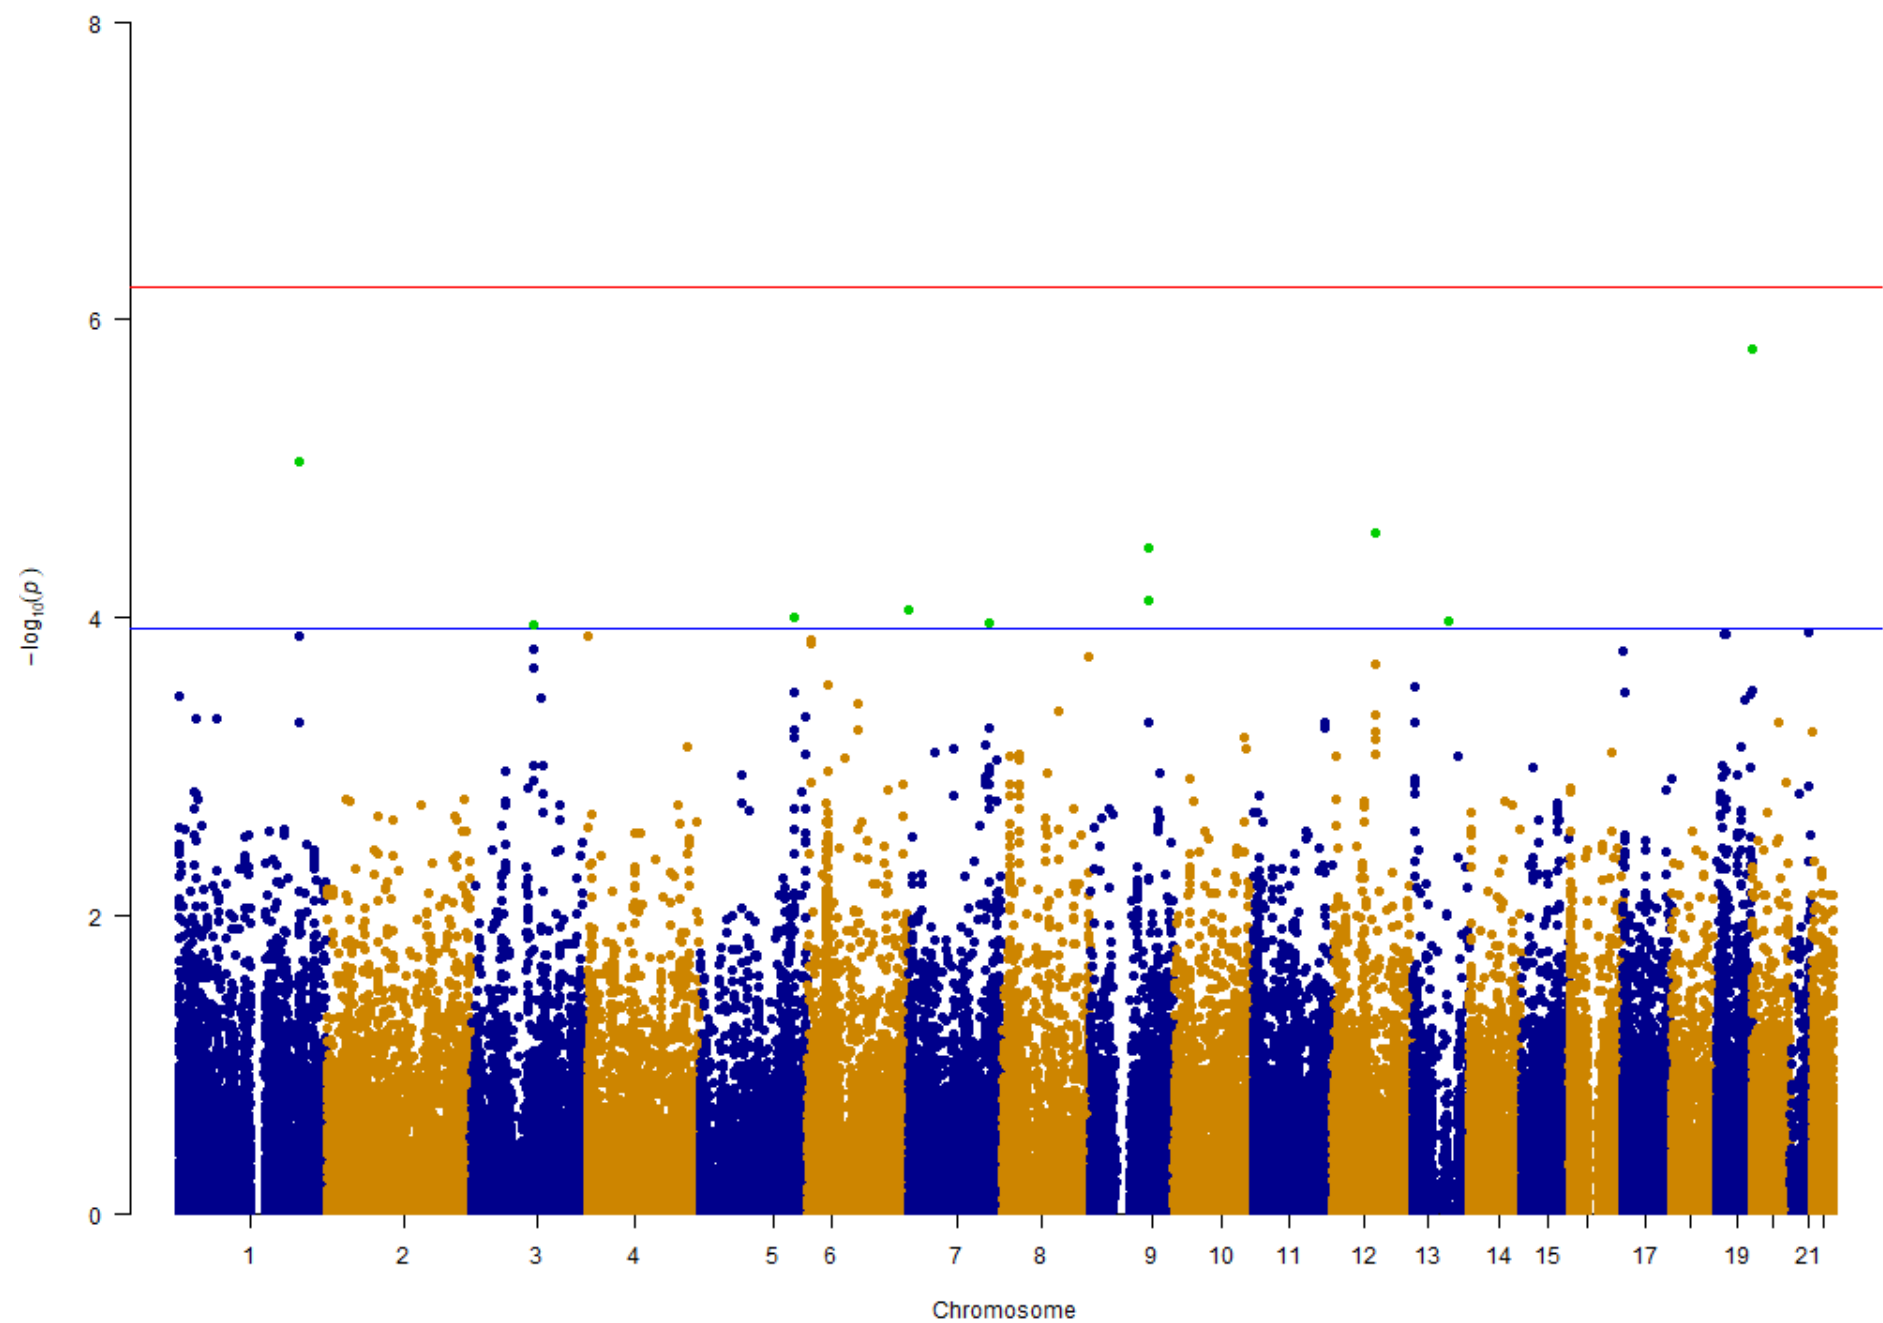

Supplement: f1 [file 2893662.f1.zip]

Q-Q plot of right caudate DaTscan EWAS

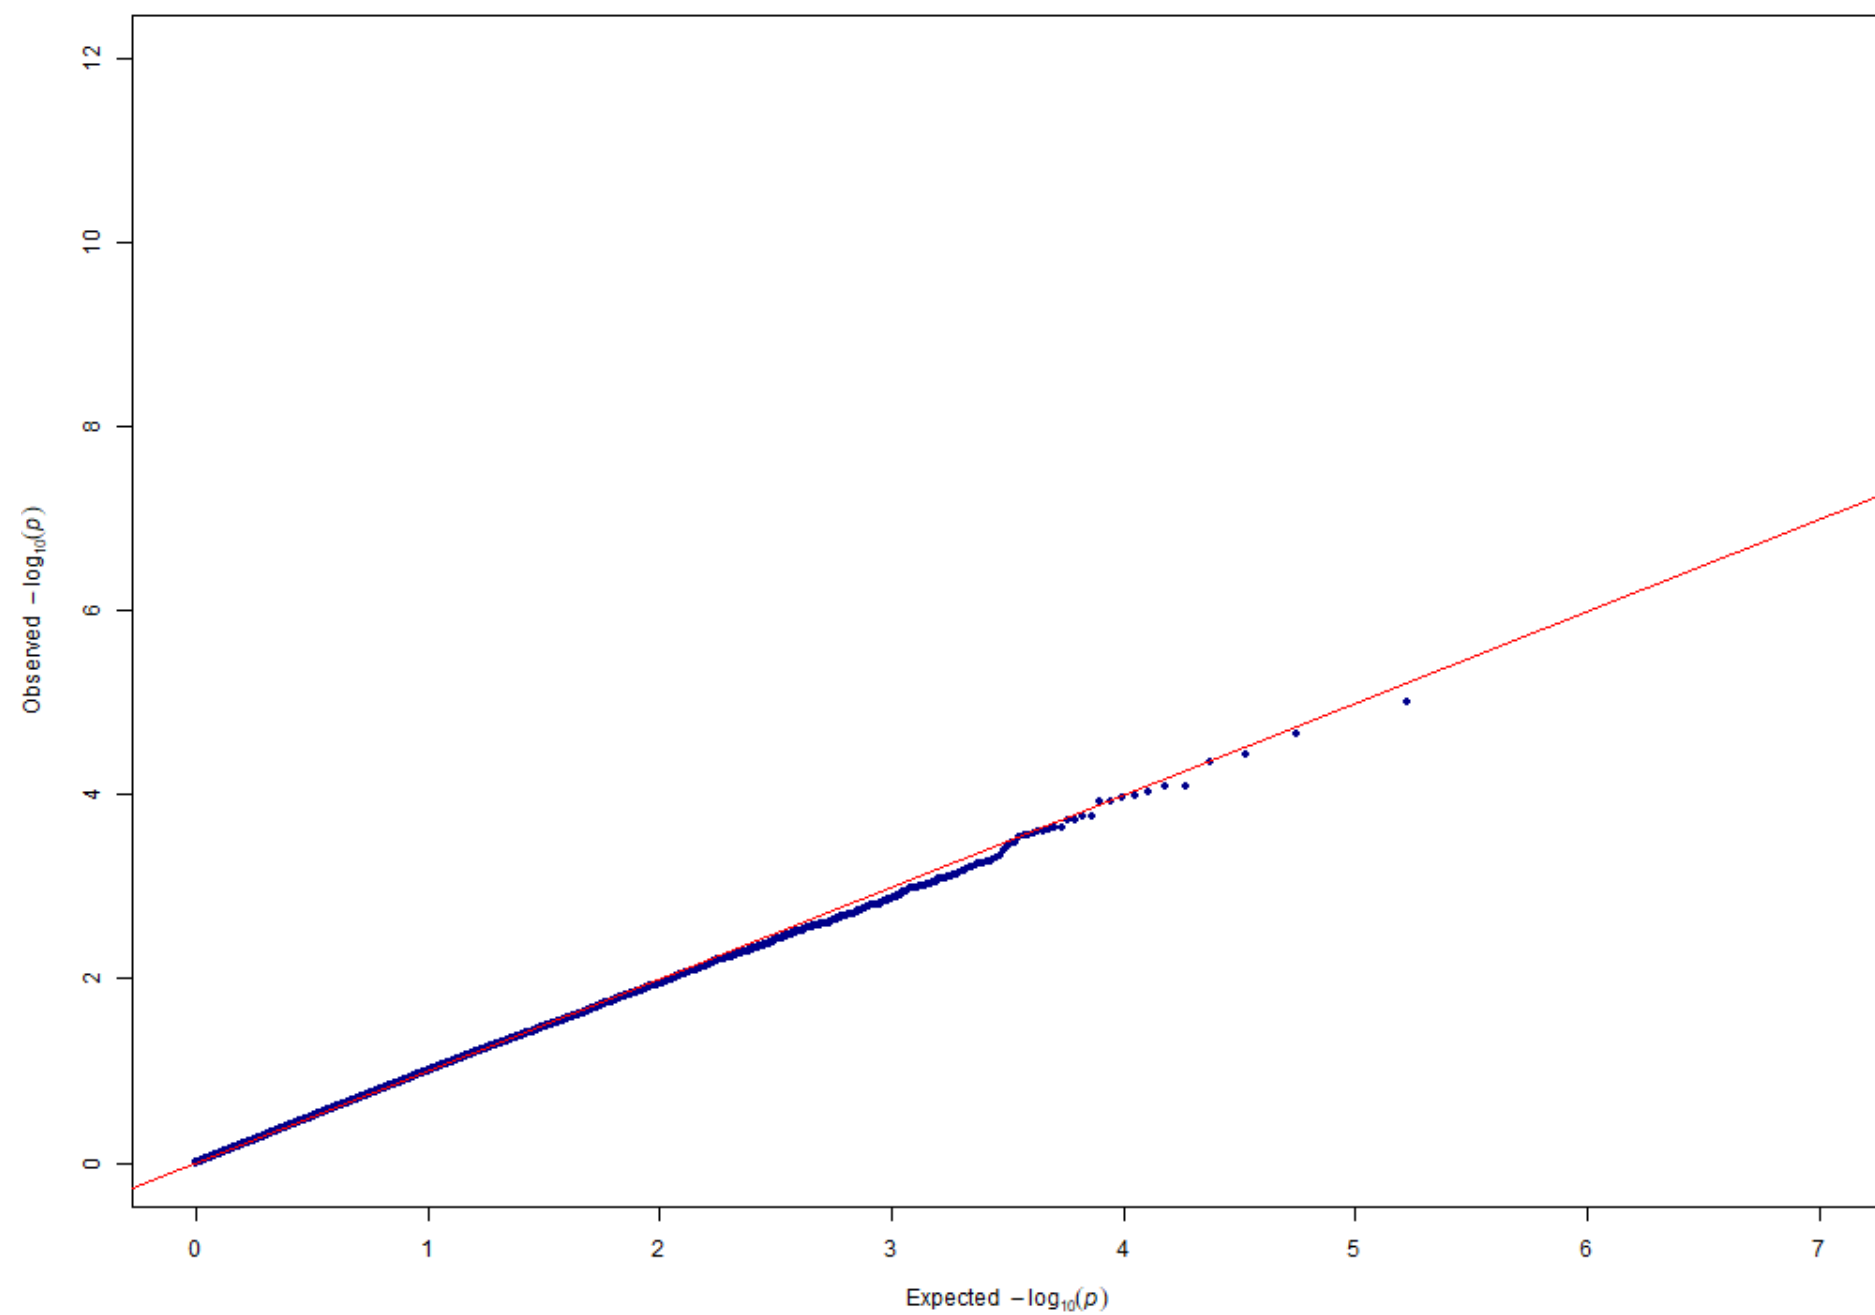

Supplement: f1 [file 2893662.f1.zip]

Manhattan plot of right caudate DaTscan EWAS

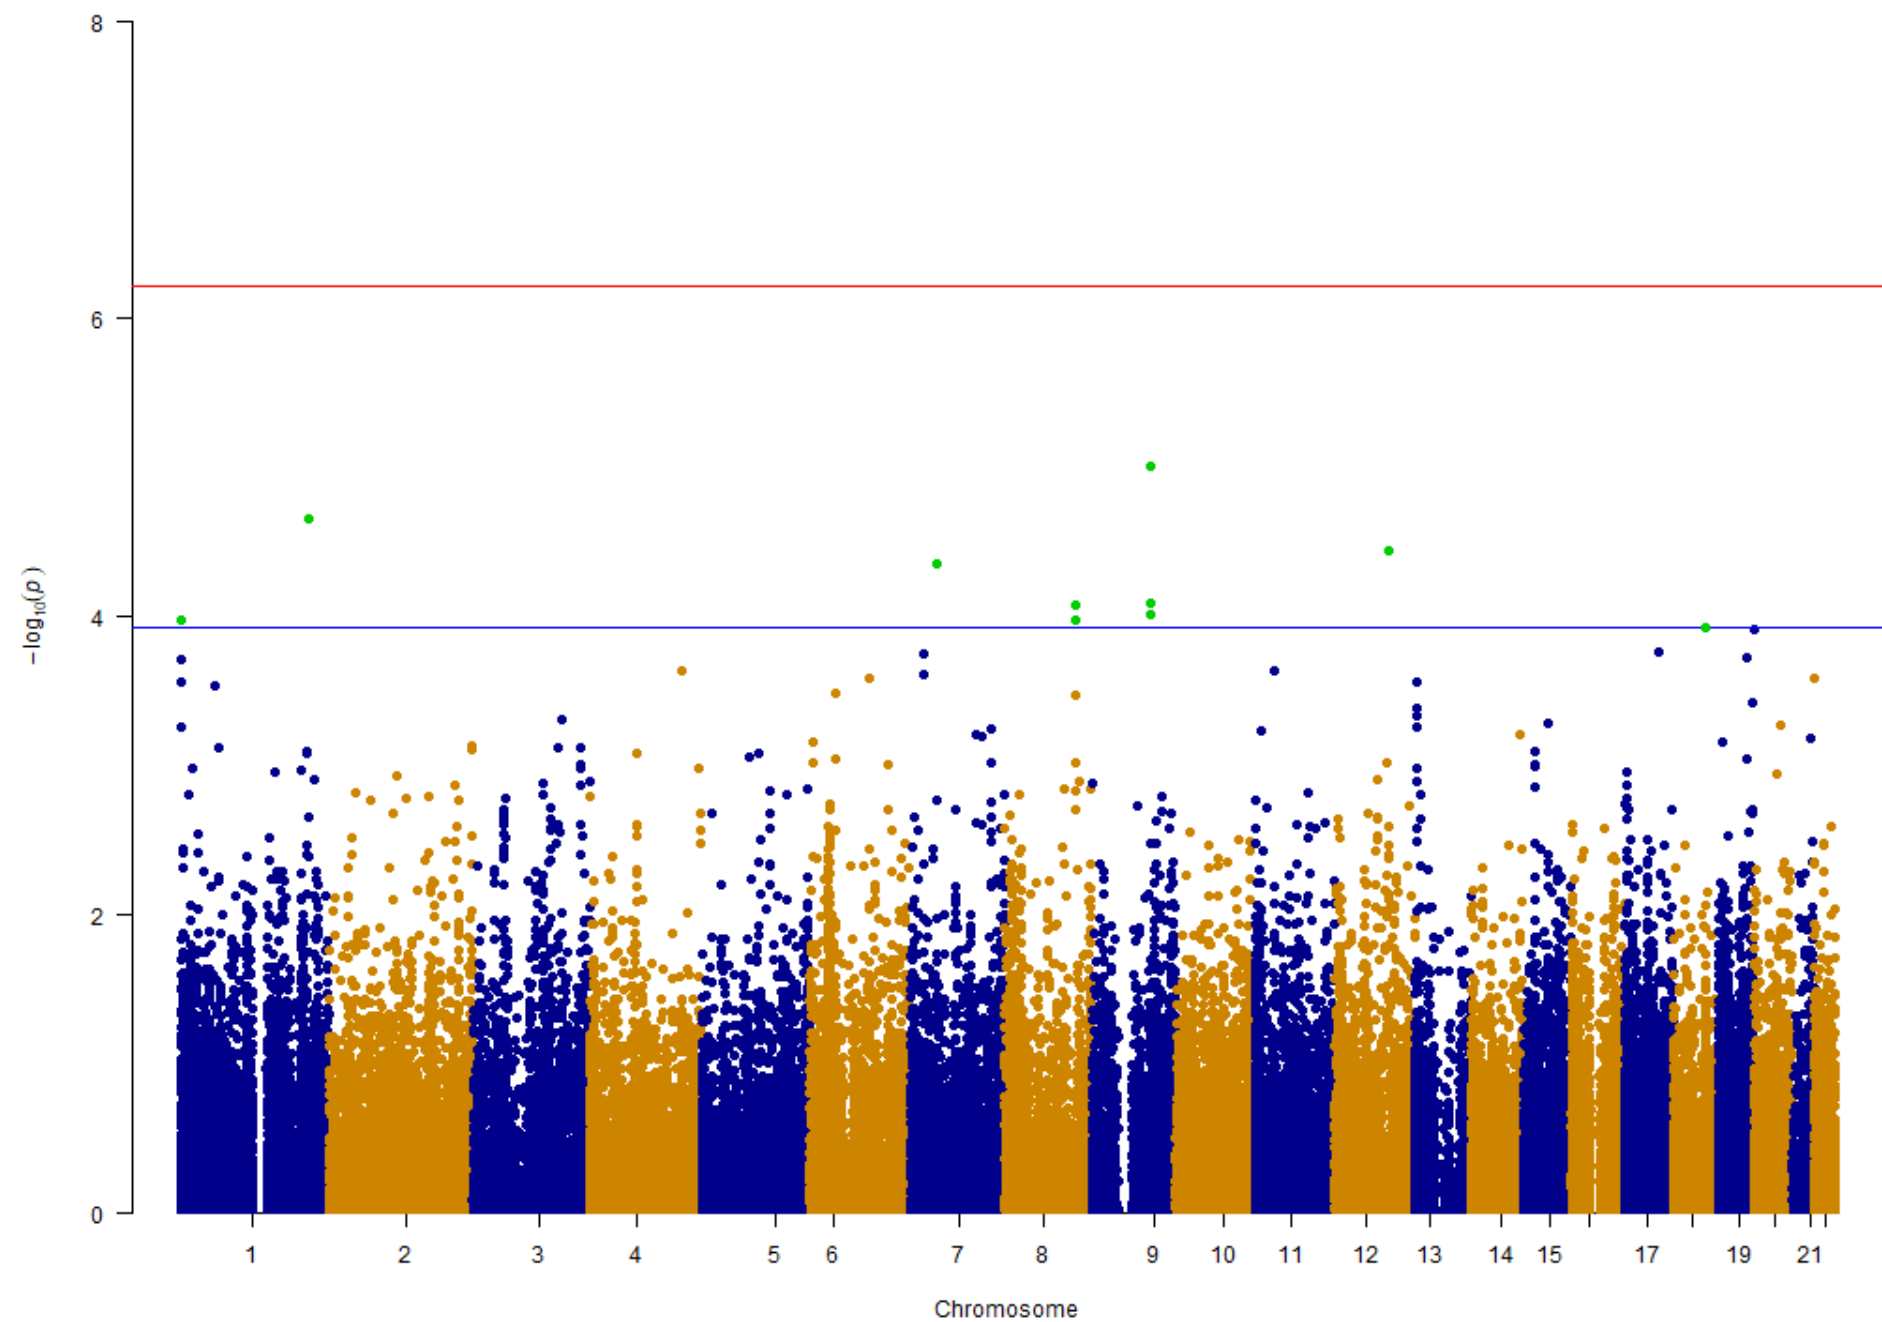

Supplement: f1 [file 2893662.f1.zip]

Manhattan plot of left putamen DaTscan GWAS

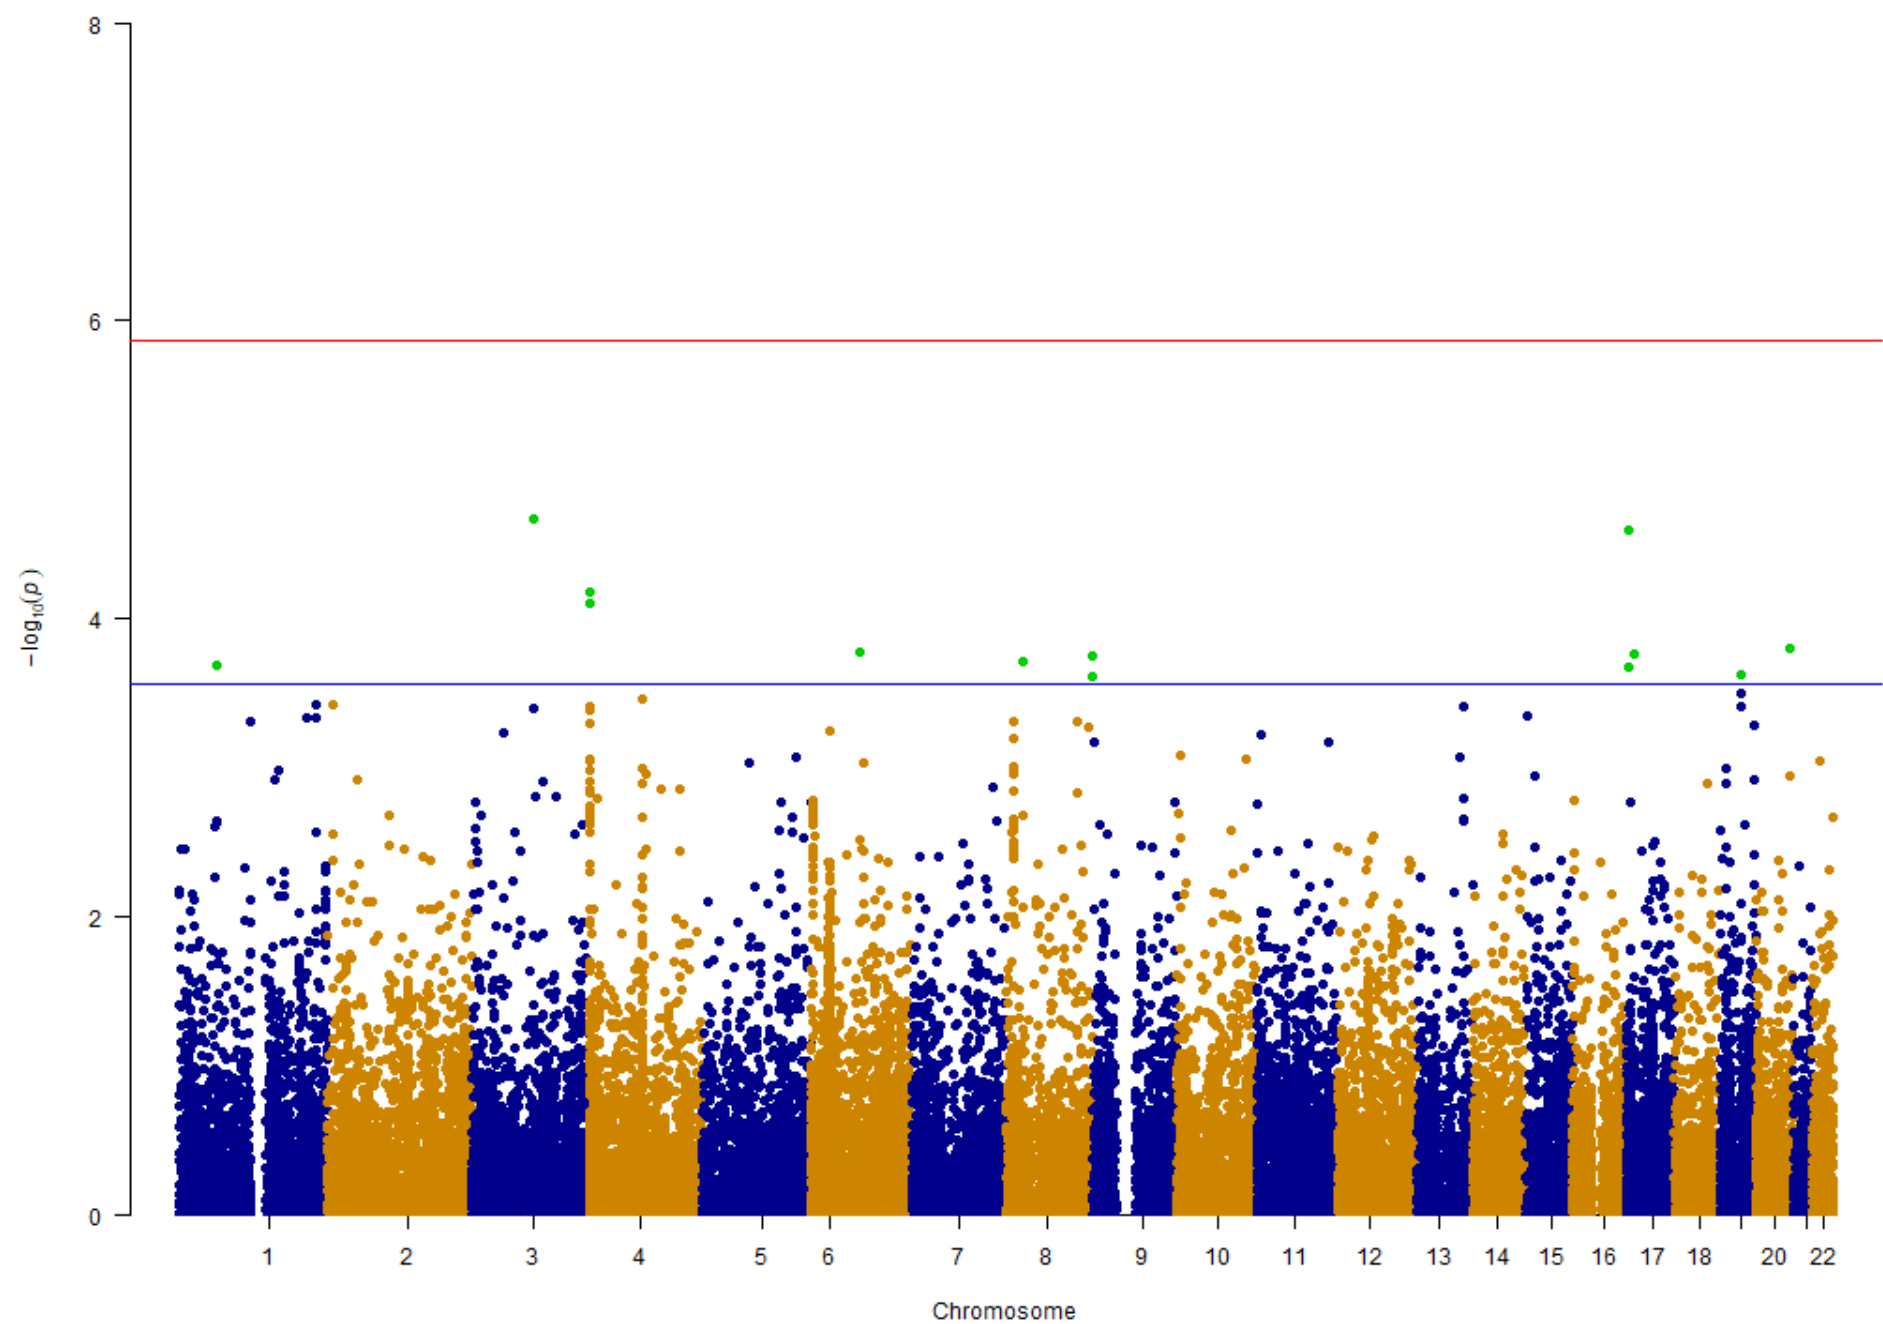

Supplement: f1 [file 2893662.f1.zip]

Q-Q plot of left anterior putamen DaTscan EWAS

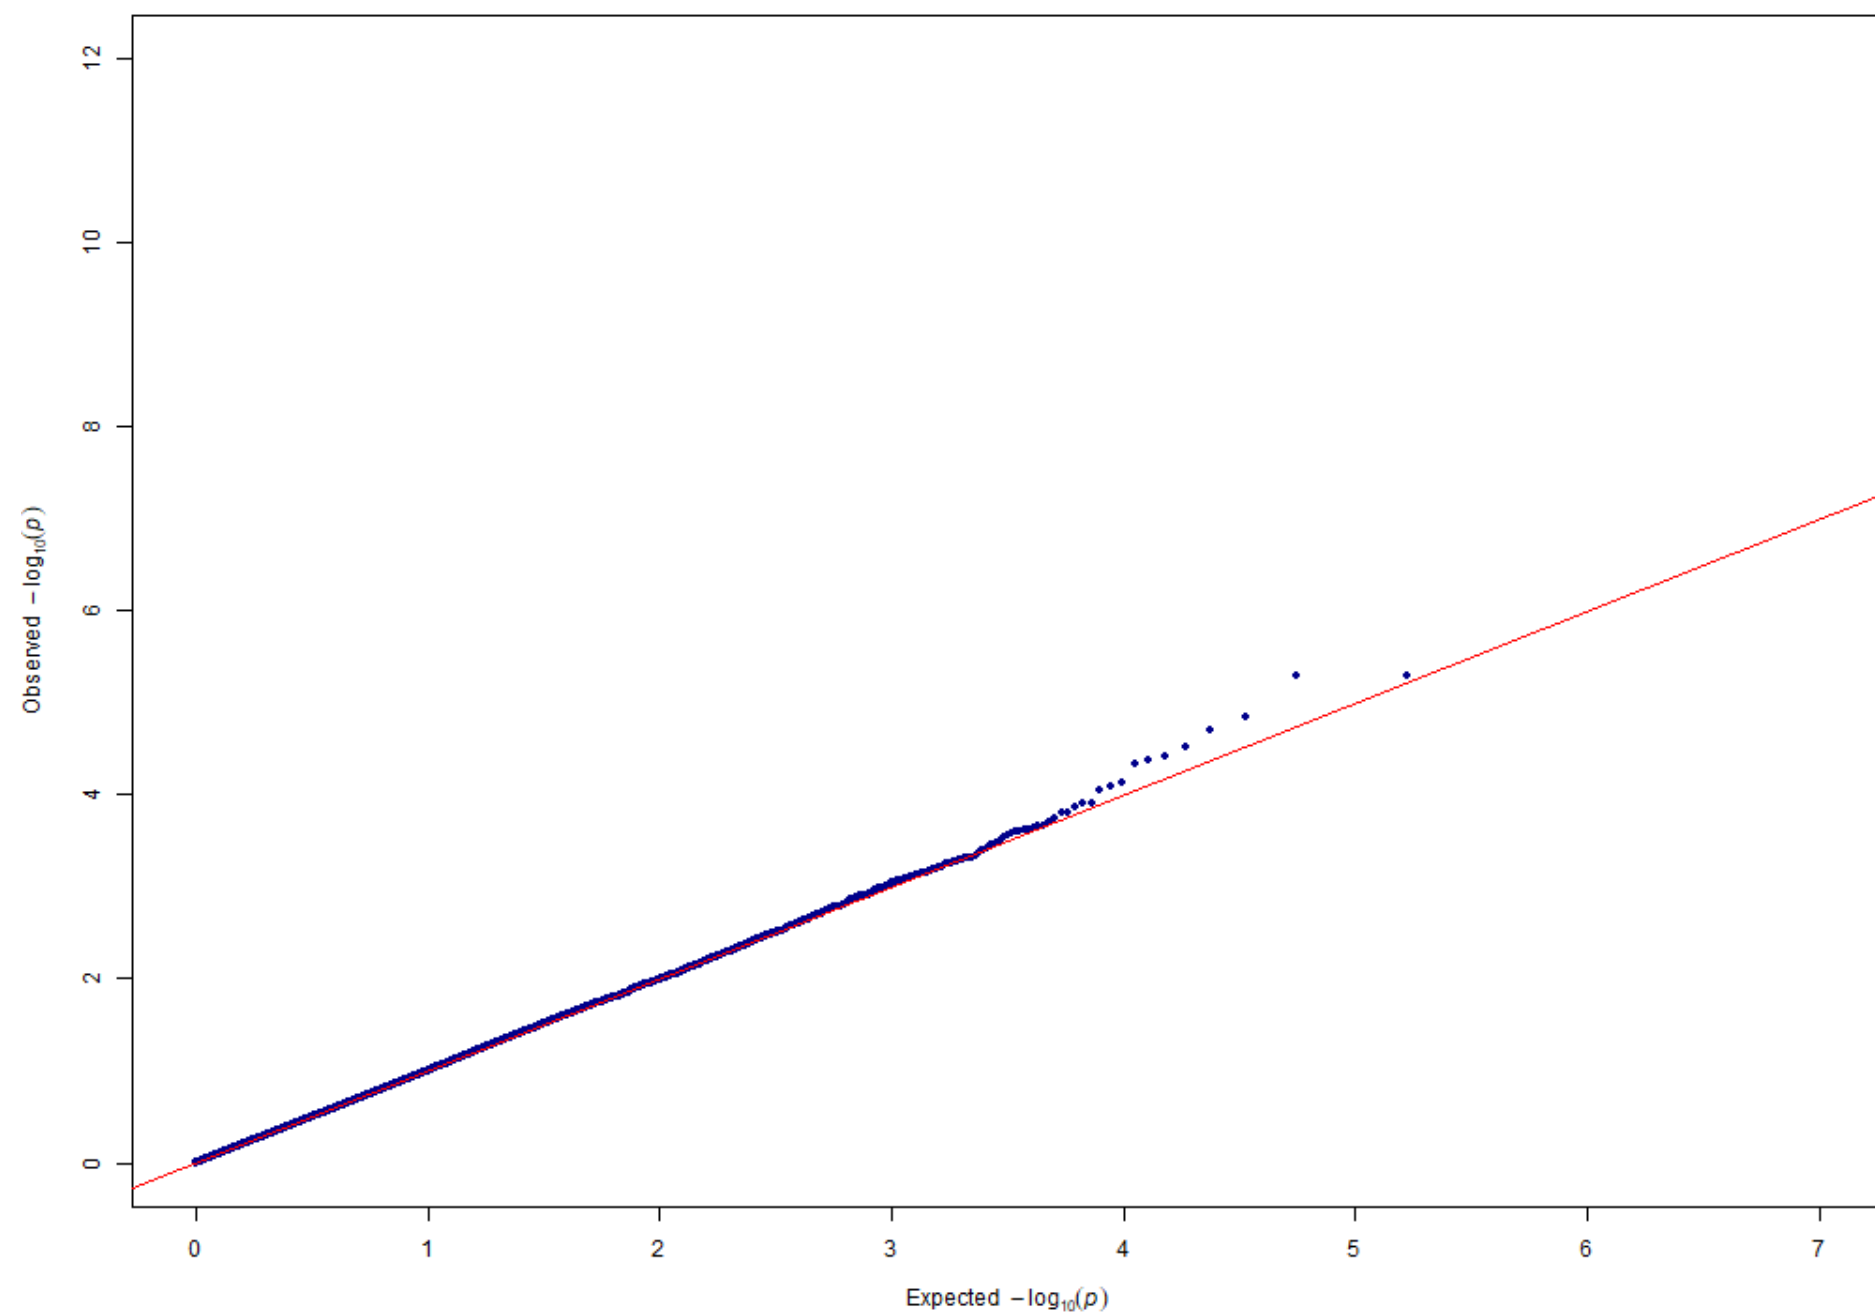

Supplement: f1 [file 2893662.f1.zip]

Manhattan plot of right anterior putamen DaTscan EWAS

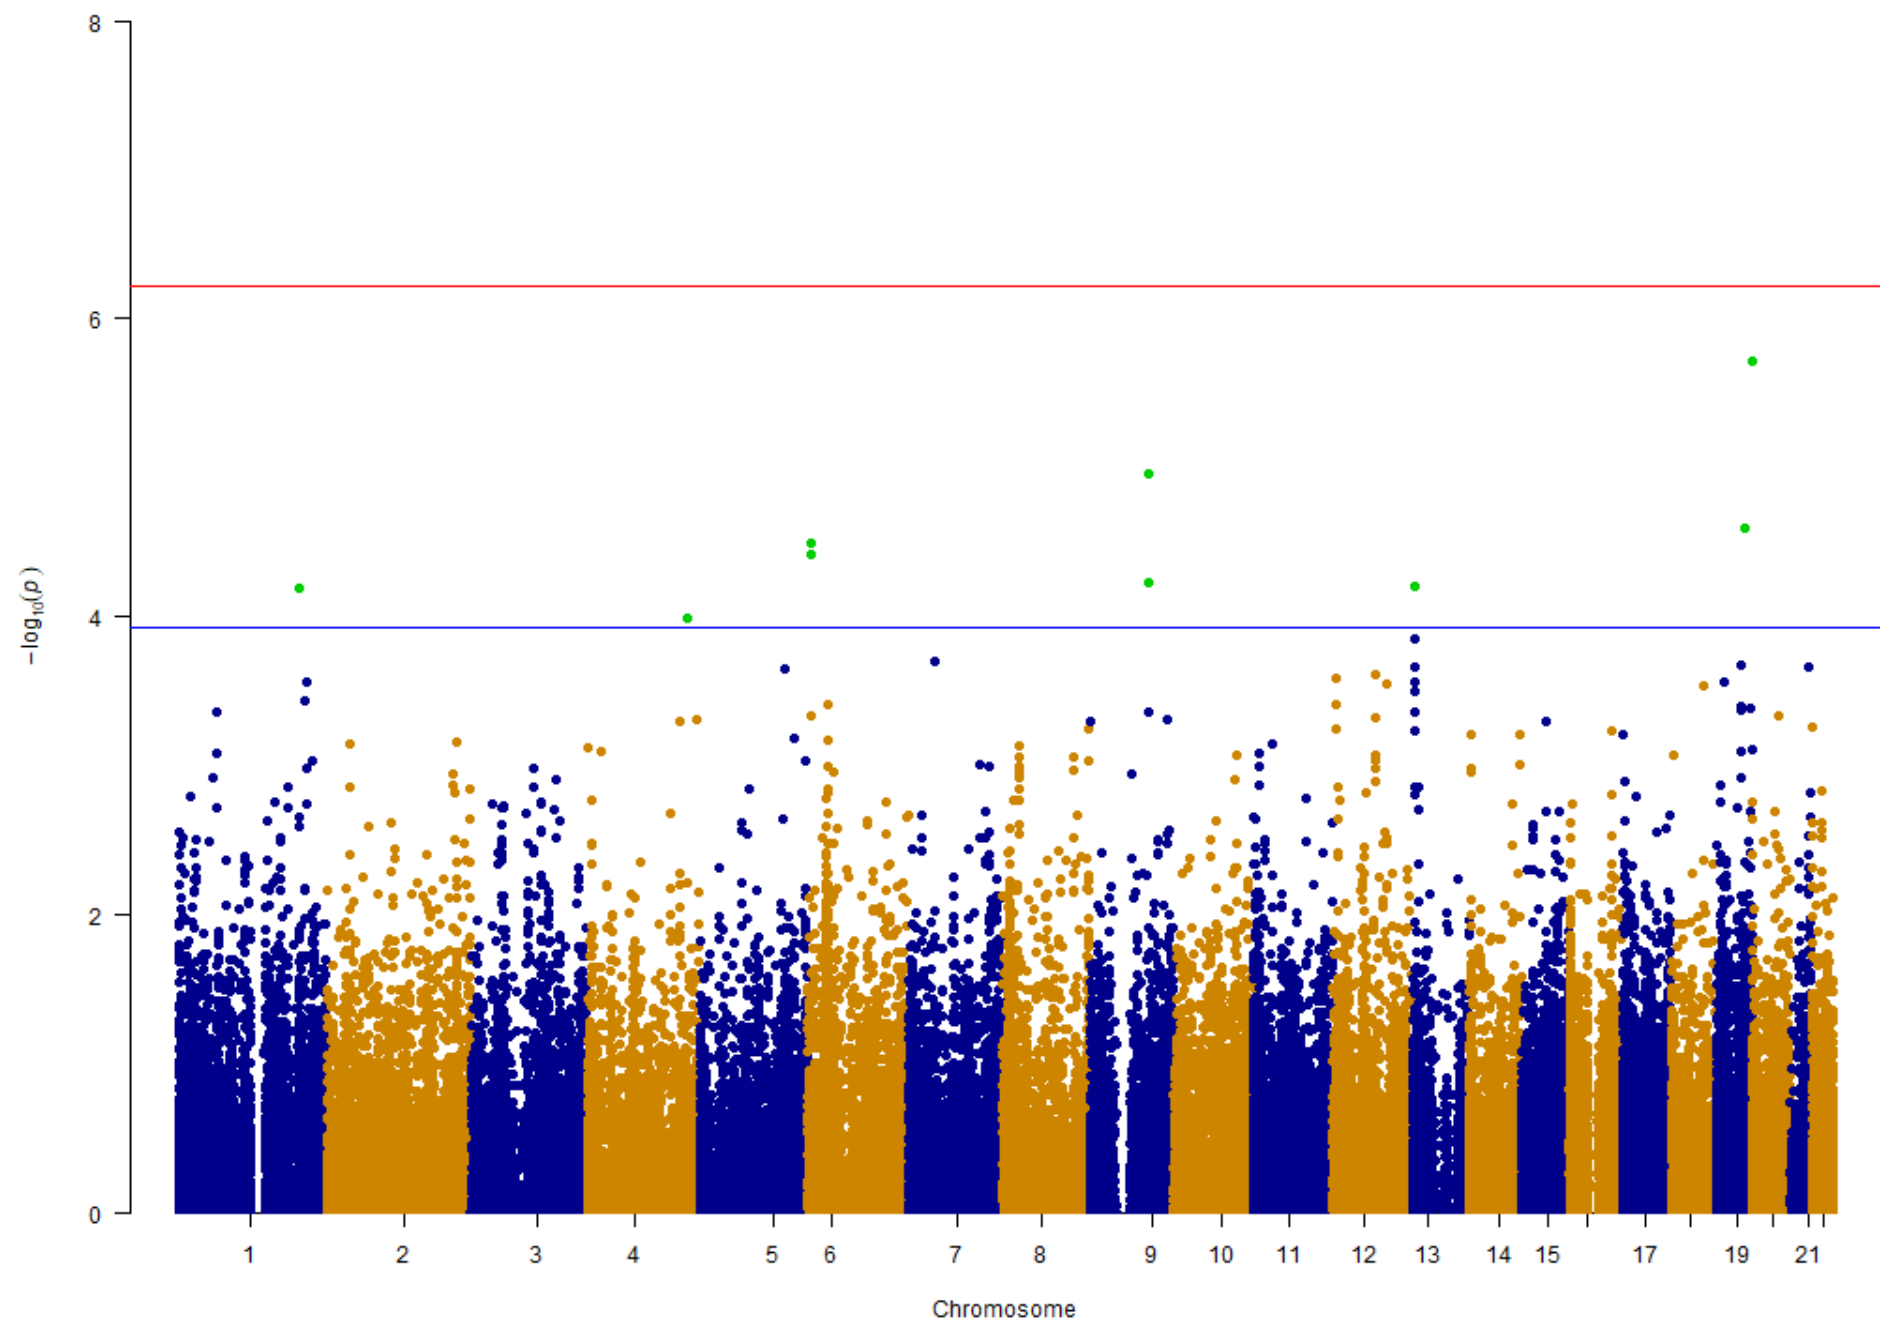

Supplement: f1 [file 2893662.f1.zip]

Q-Q plot of right caudate DaTscan GWAS

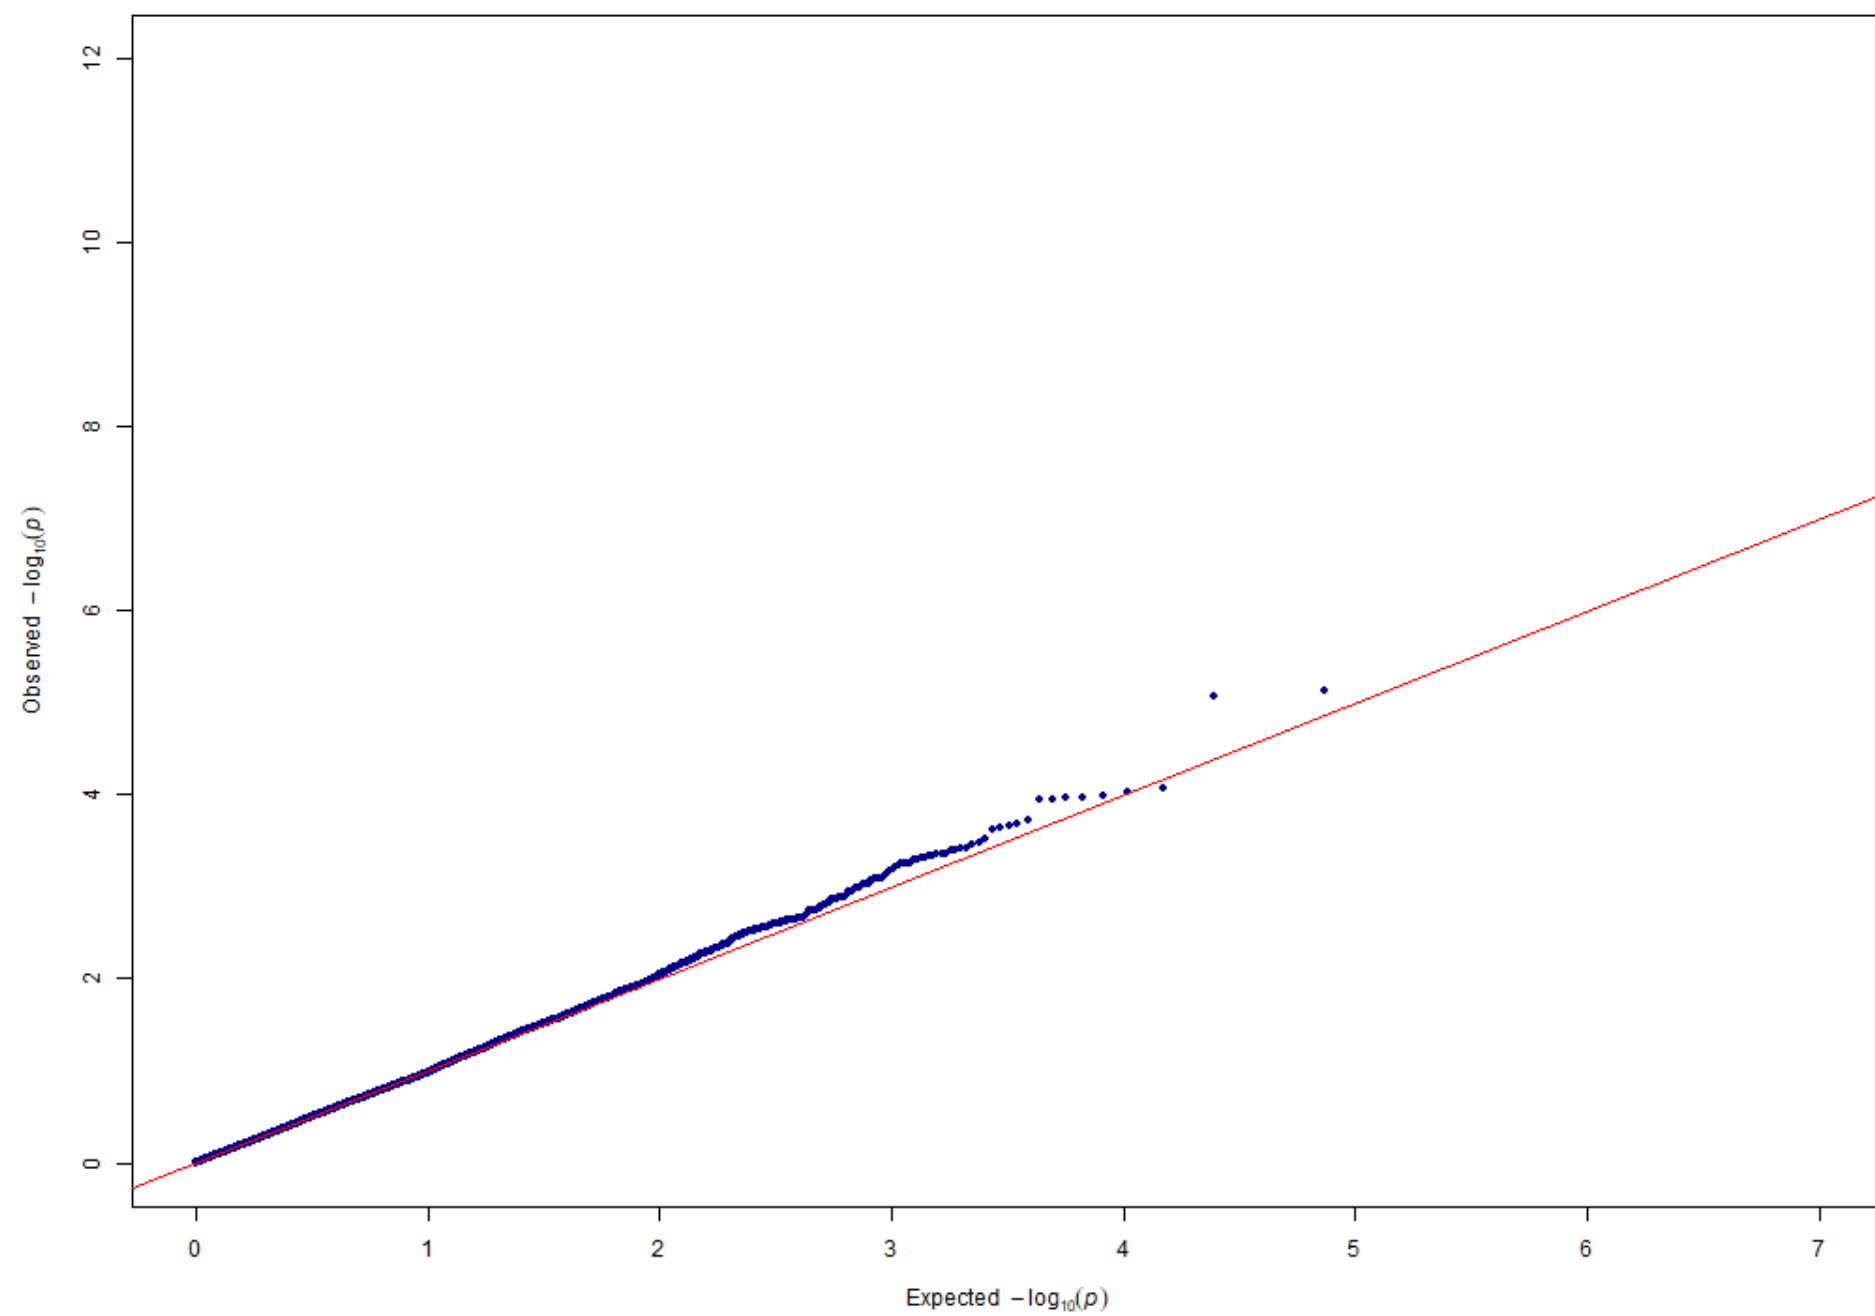

Supplement: f1 [file 2893662.f1.zip]

Manhattan plot of left anterior putamen DaTscan EWAS

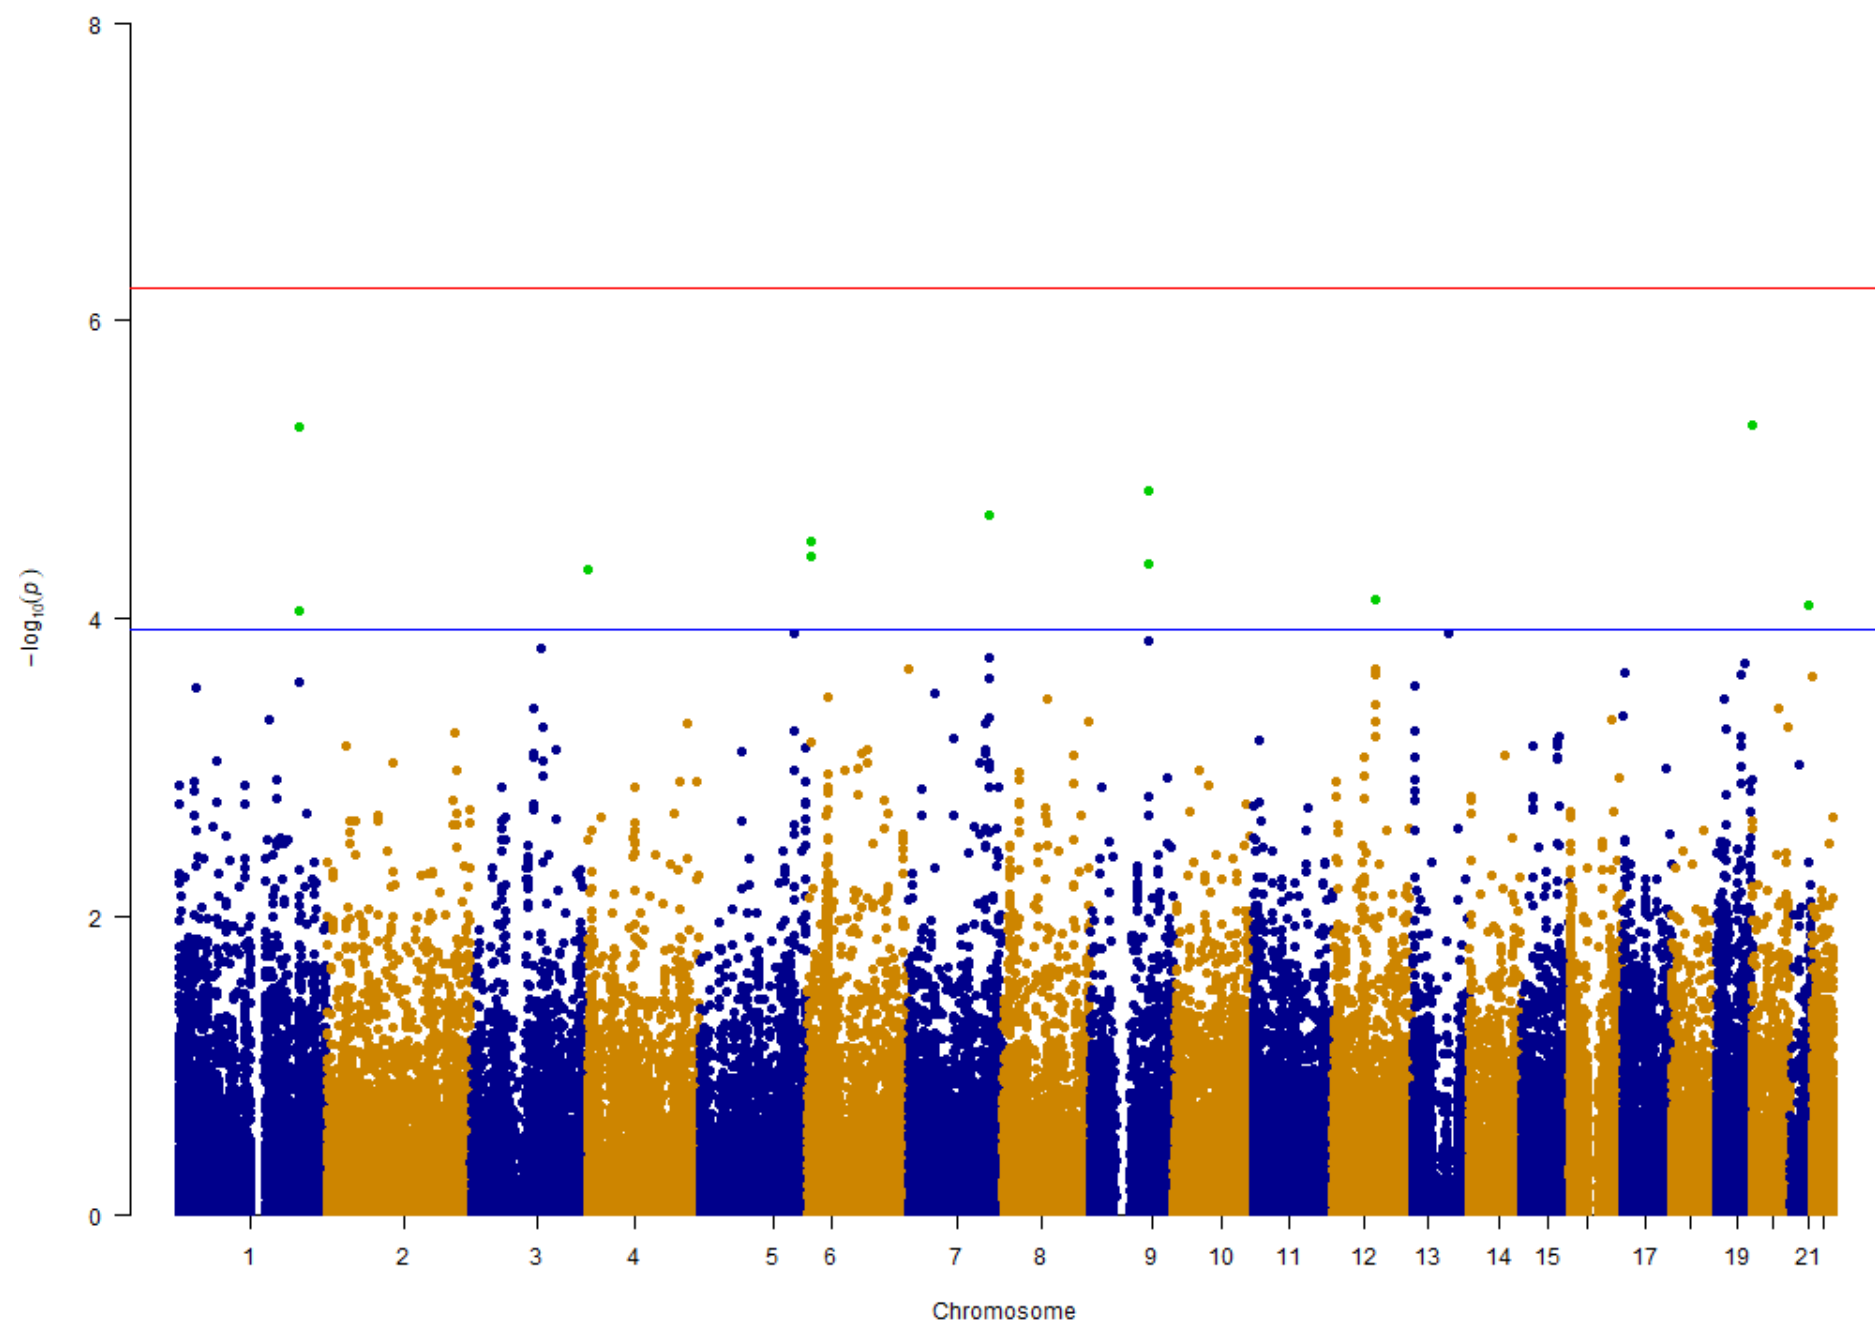

Supplement: f1 [file 2893662.f1.zip]

Q-Q plot of right putamen DaTscan EWAS

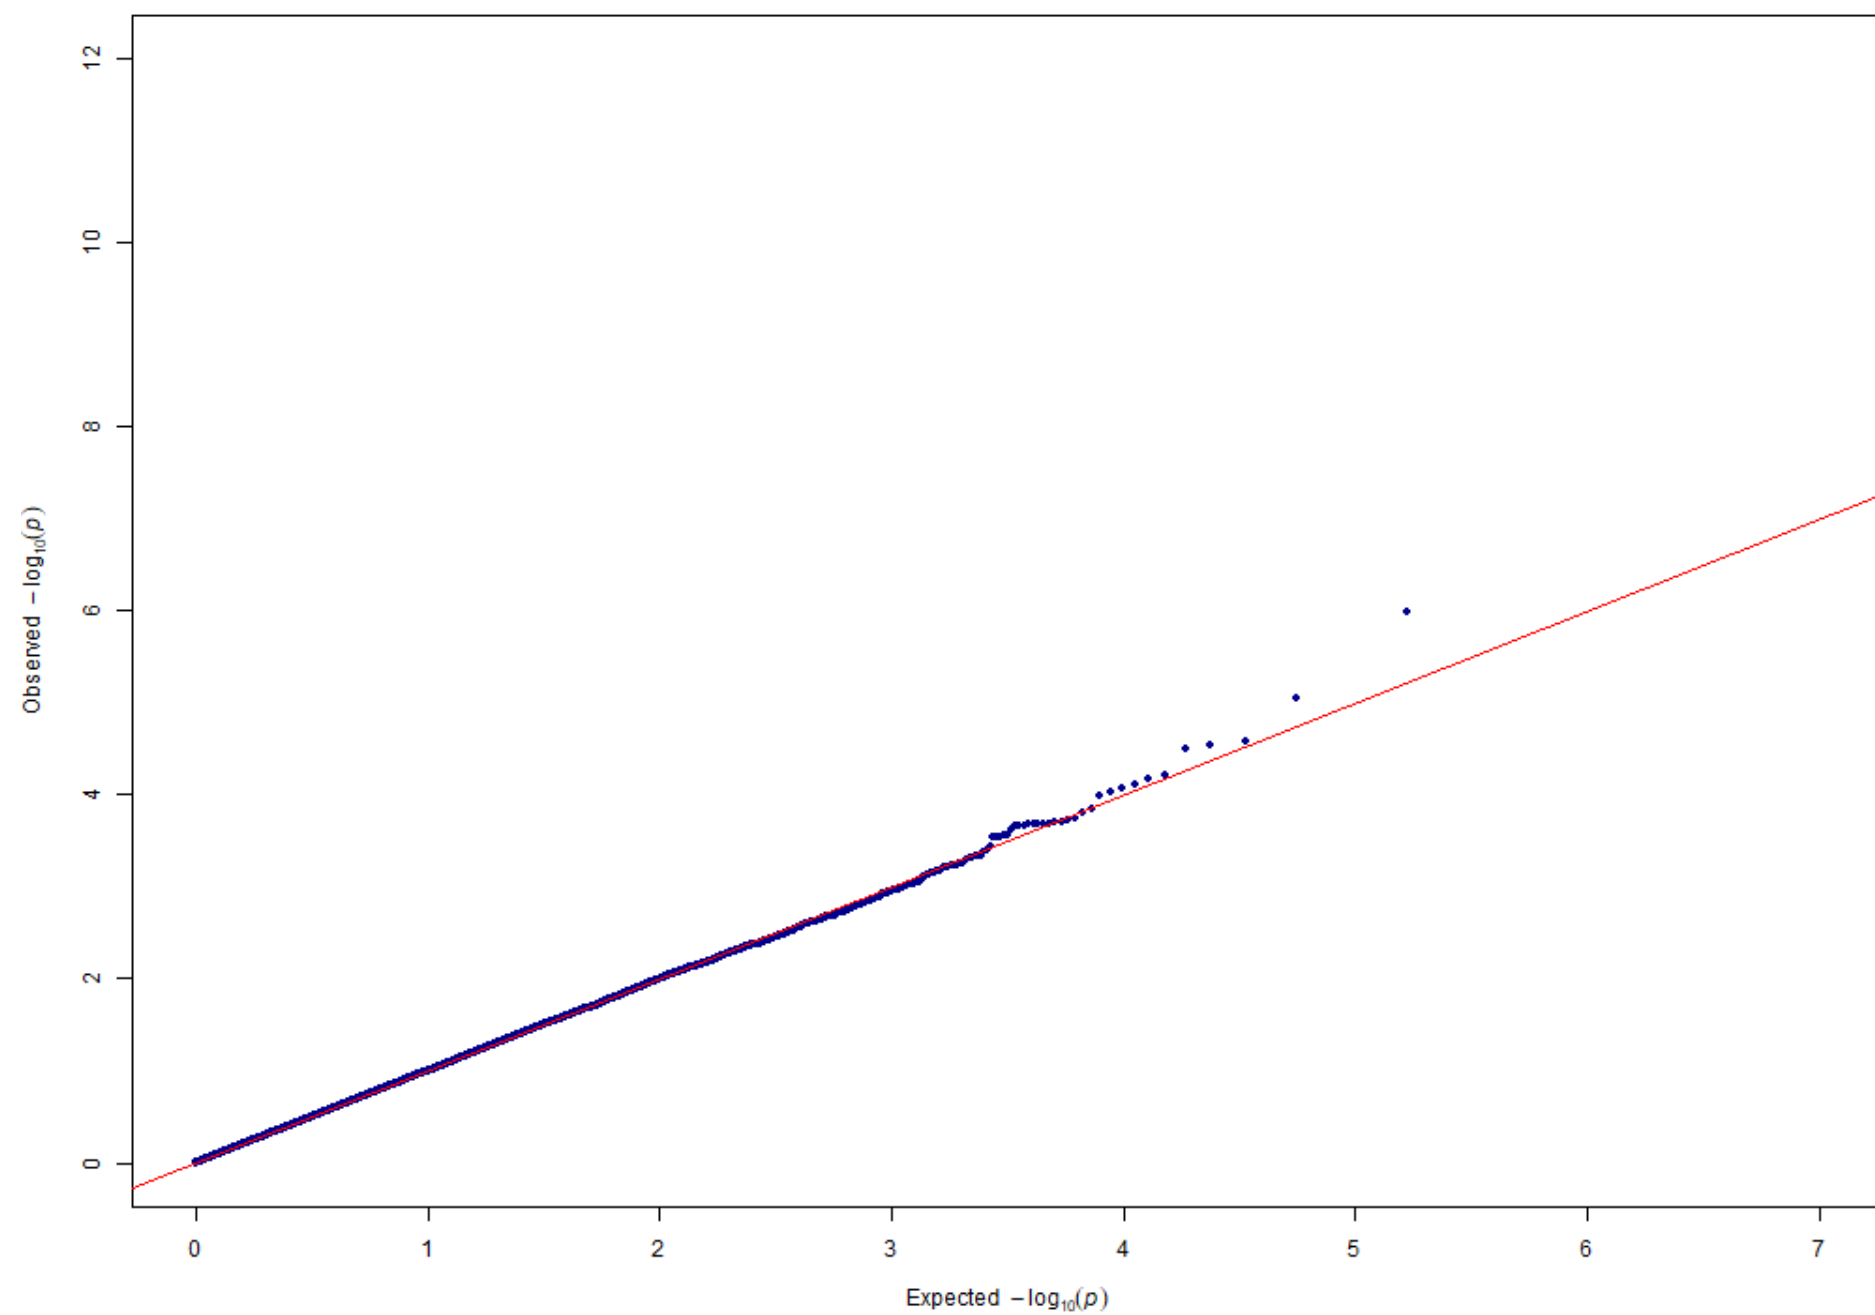

Supplement: f1 [file 2893662.f1.zip]

Manhattan plot of right caudate DaTscan GWAS

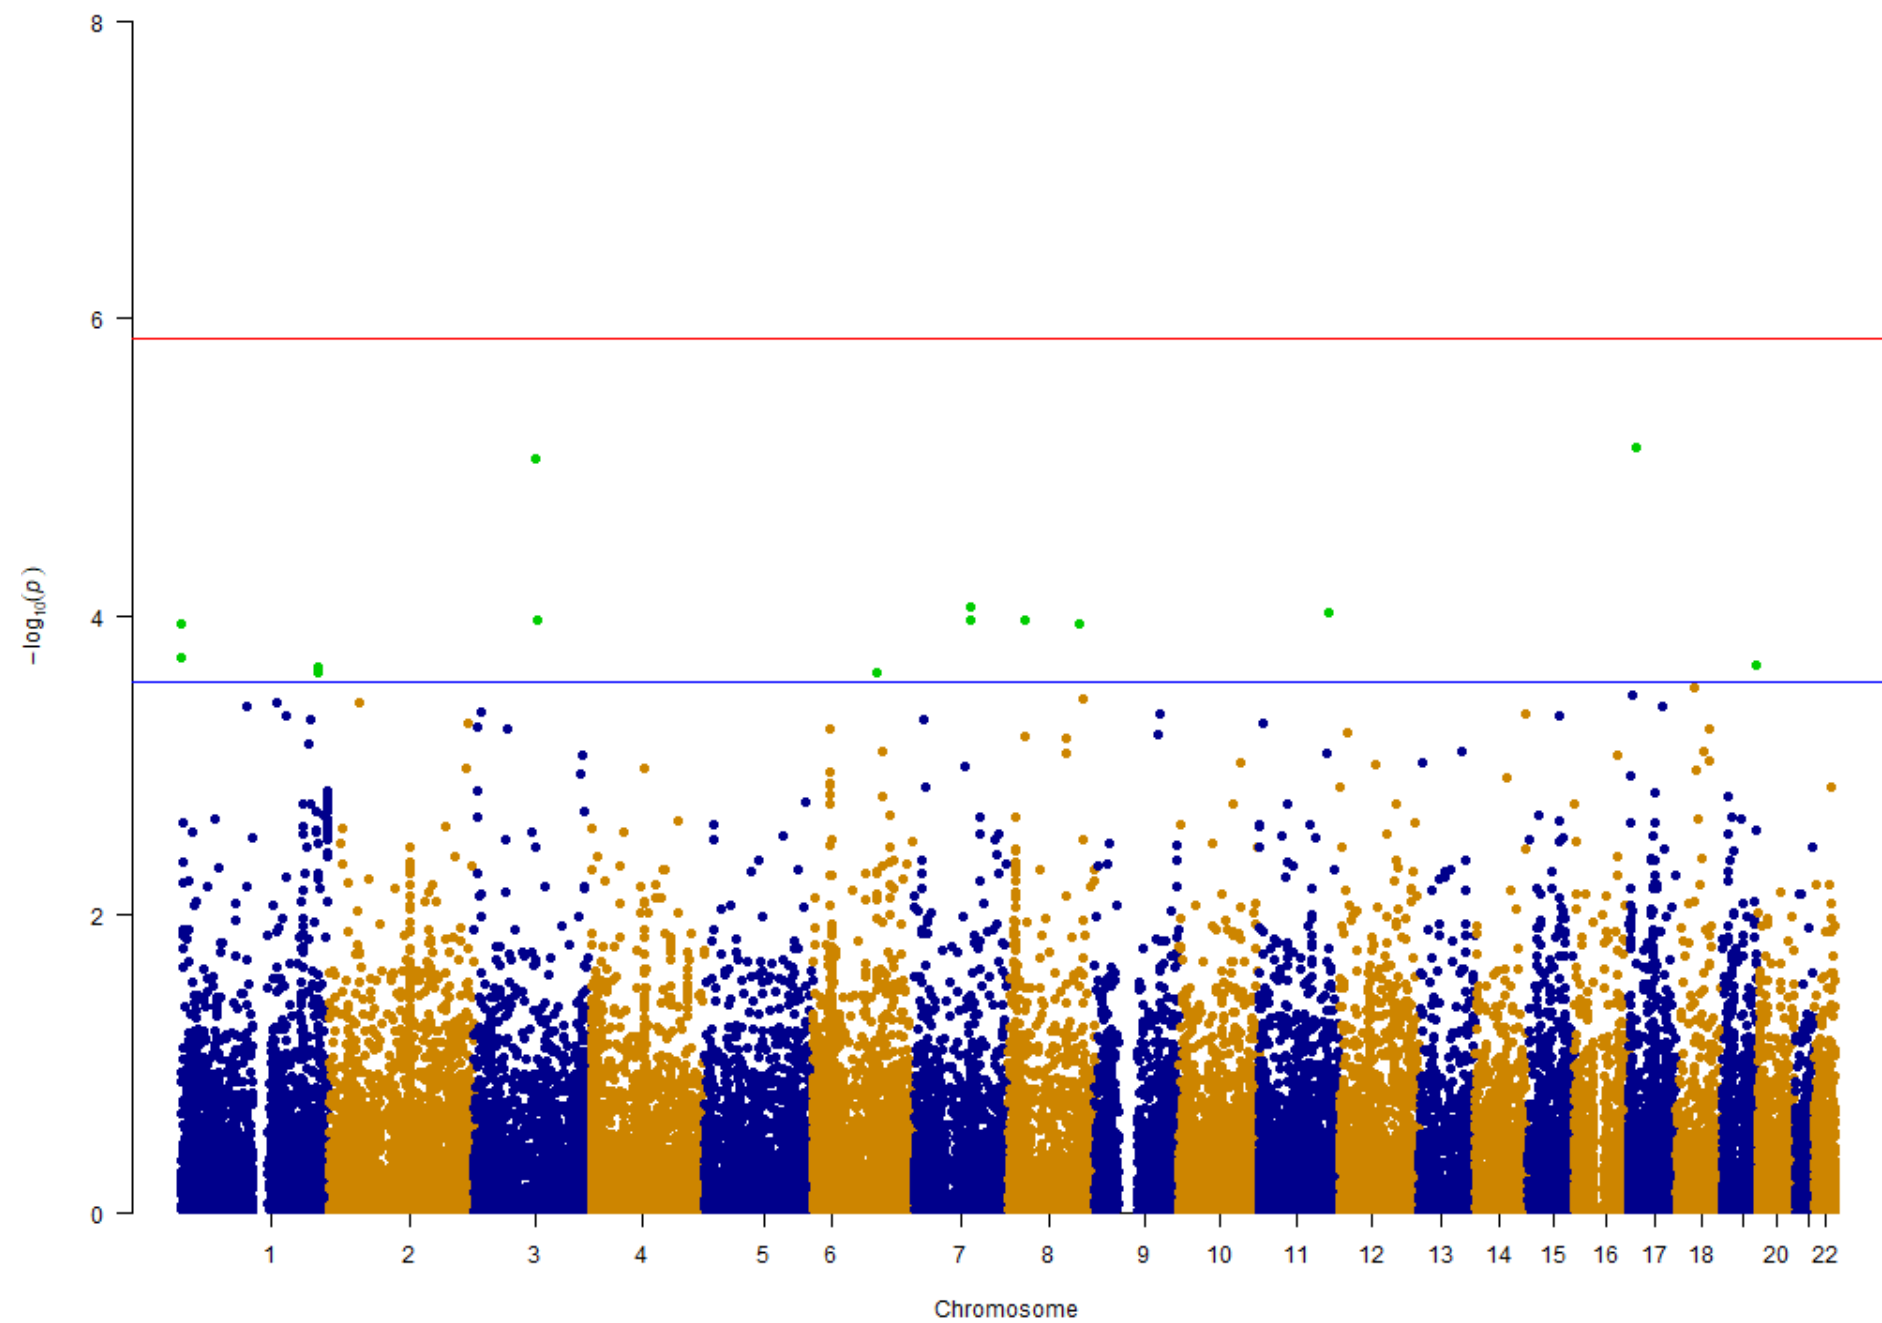

Supplement: f1 [file 2893662.f1.zip]

Q-Q plot of left anterior putamen DaTscan GWAS

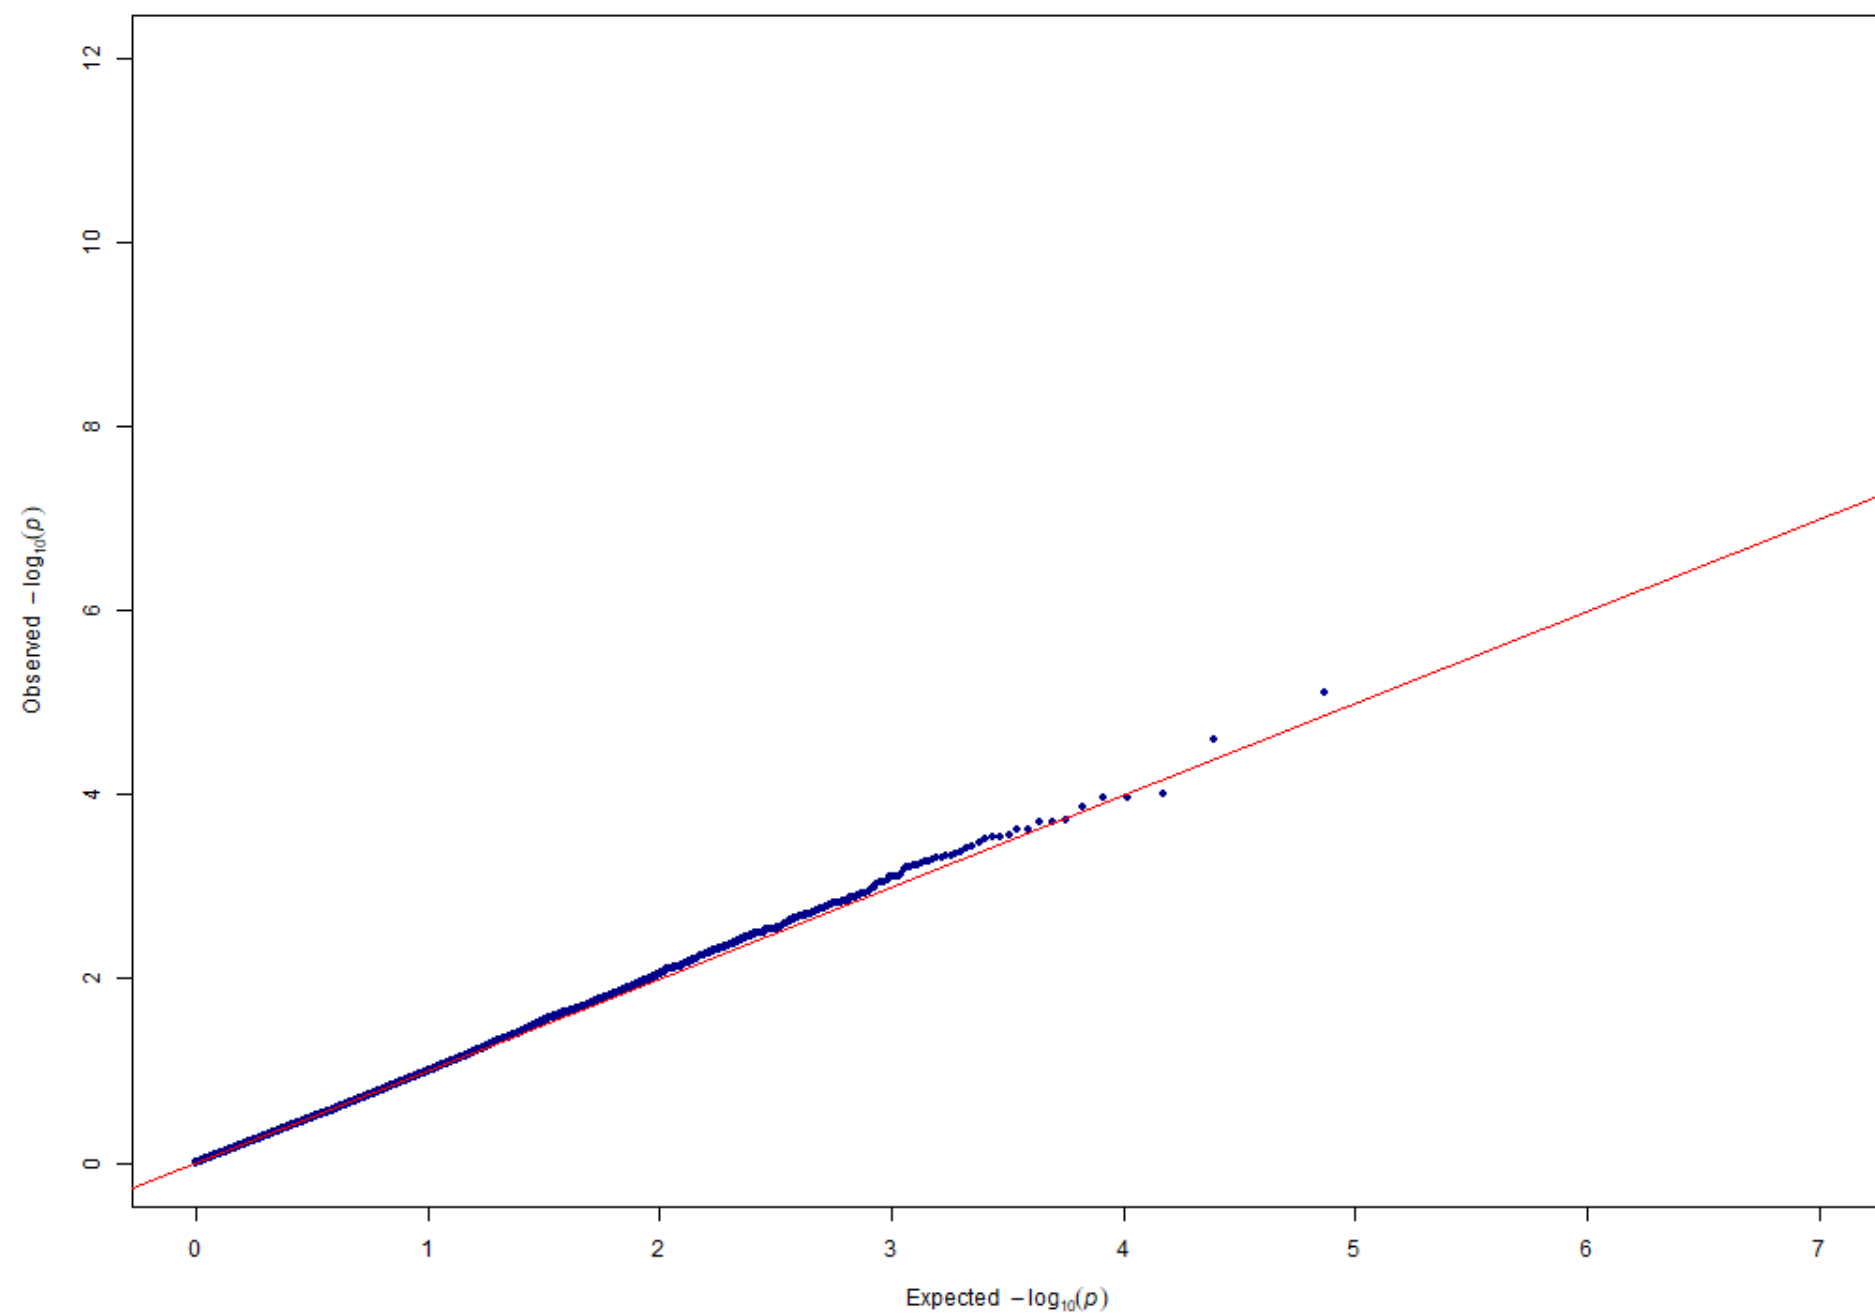

Supplement: f1 [file 2893662.f1.zip]

Q-Q plot of left caudate DaTscan GWAS

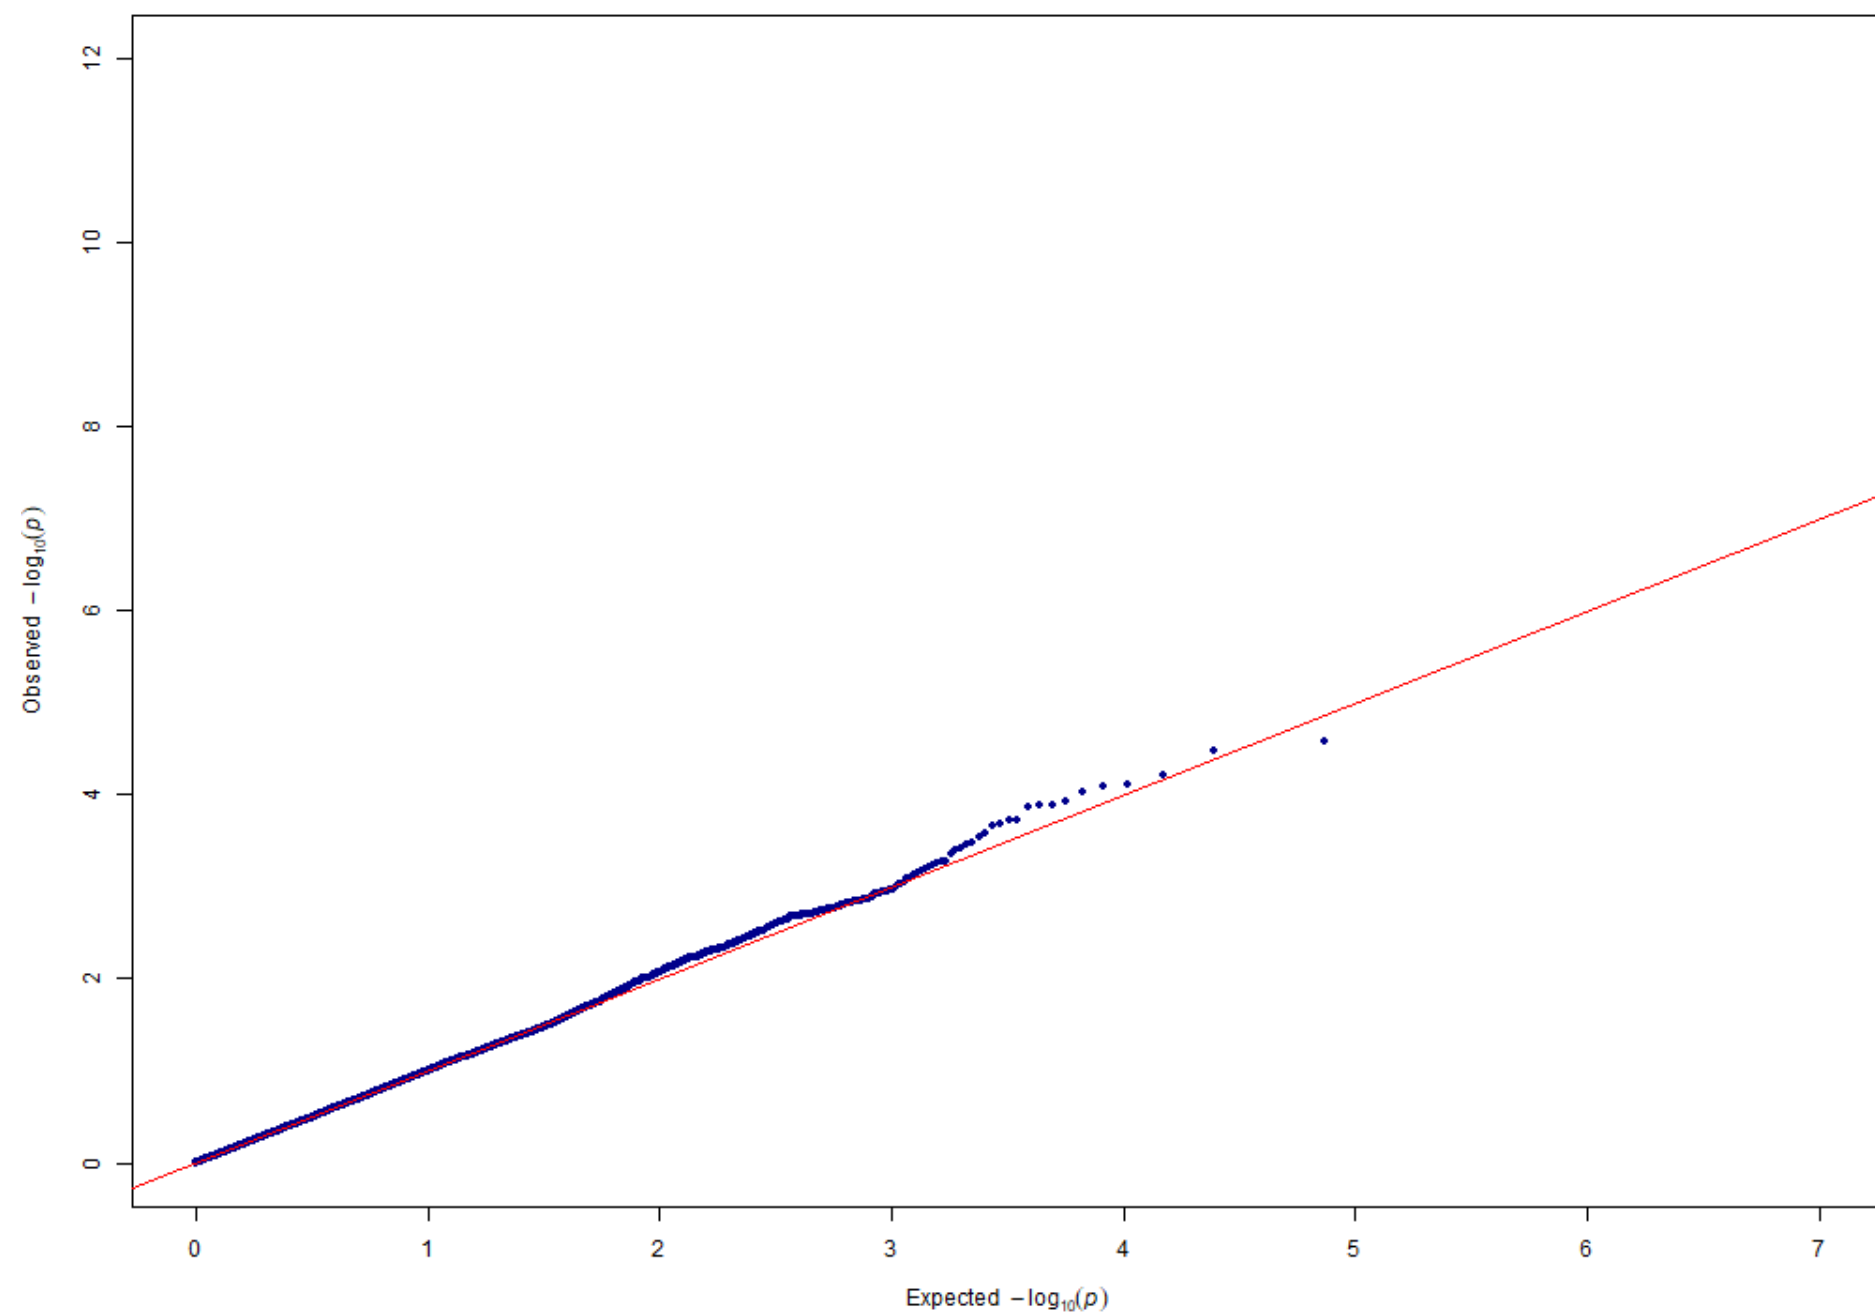

Supplement: f1 [file 2893662.f1.zip]

Q-Q plot of right anterior putamen DaTscan GWAS

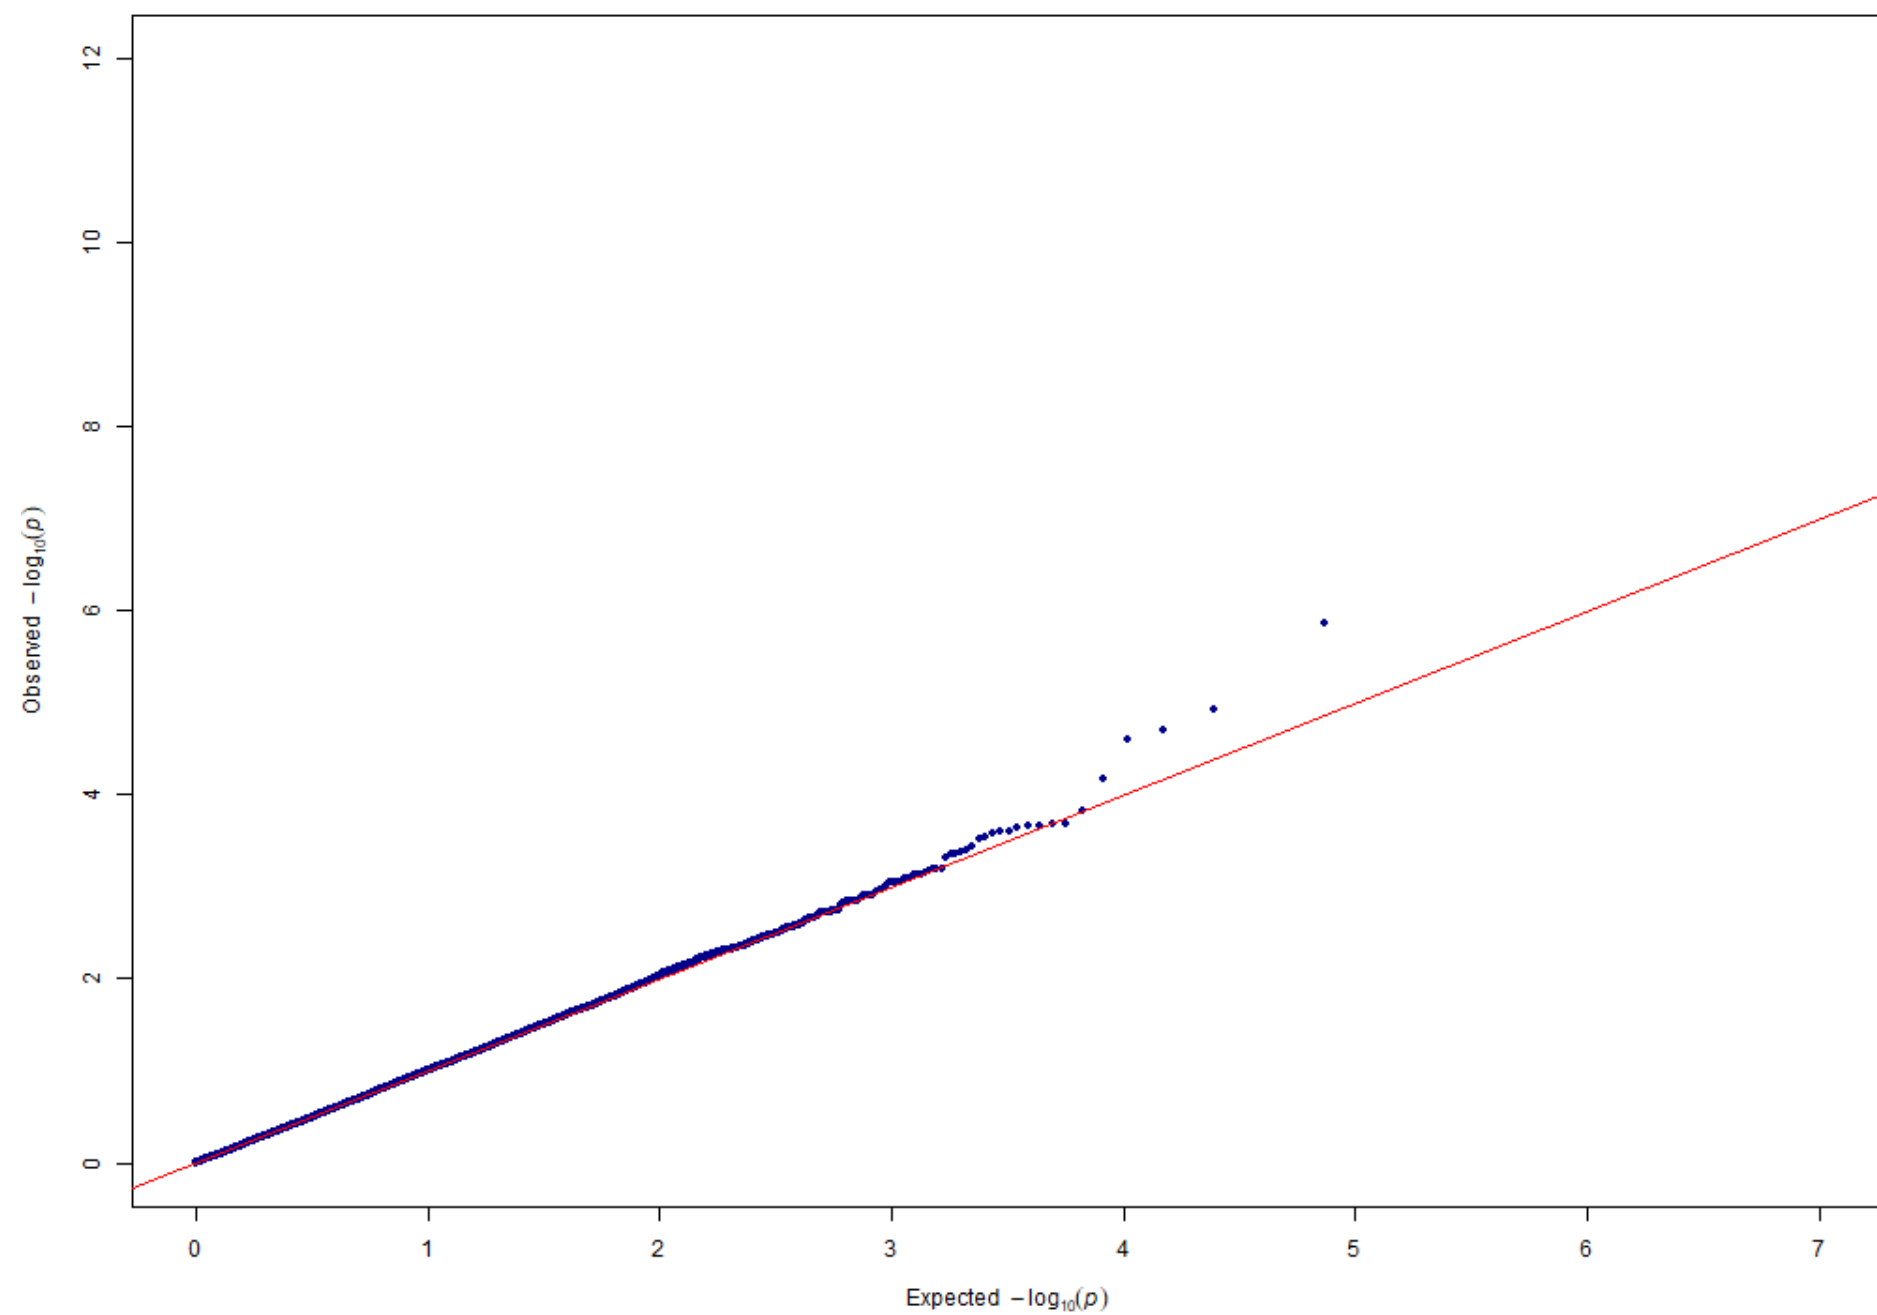

Supplement: f1 [file 2893662.f1.zip]

Manhattan plot of right putamen DaTscan GWAS

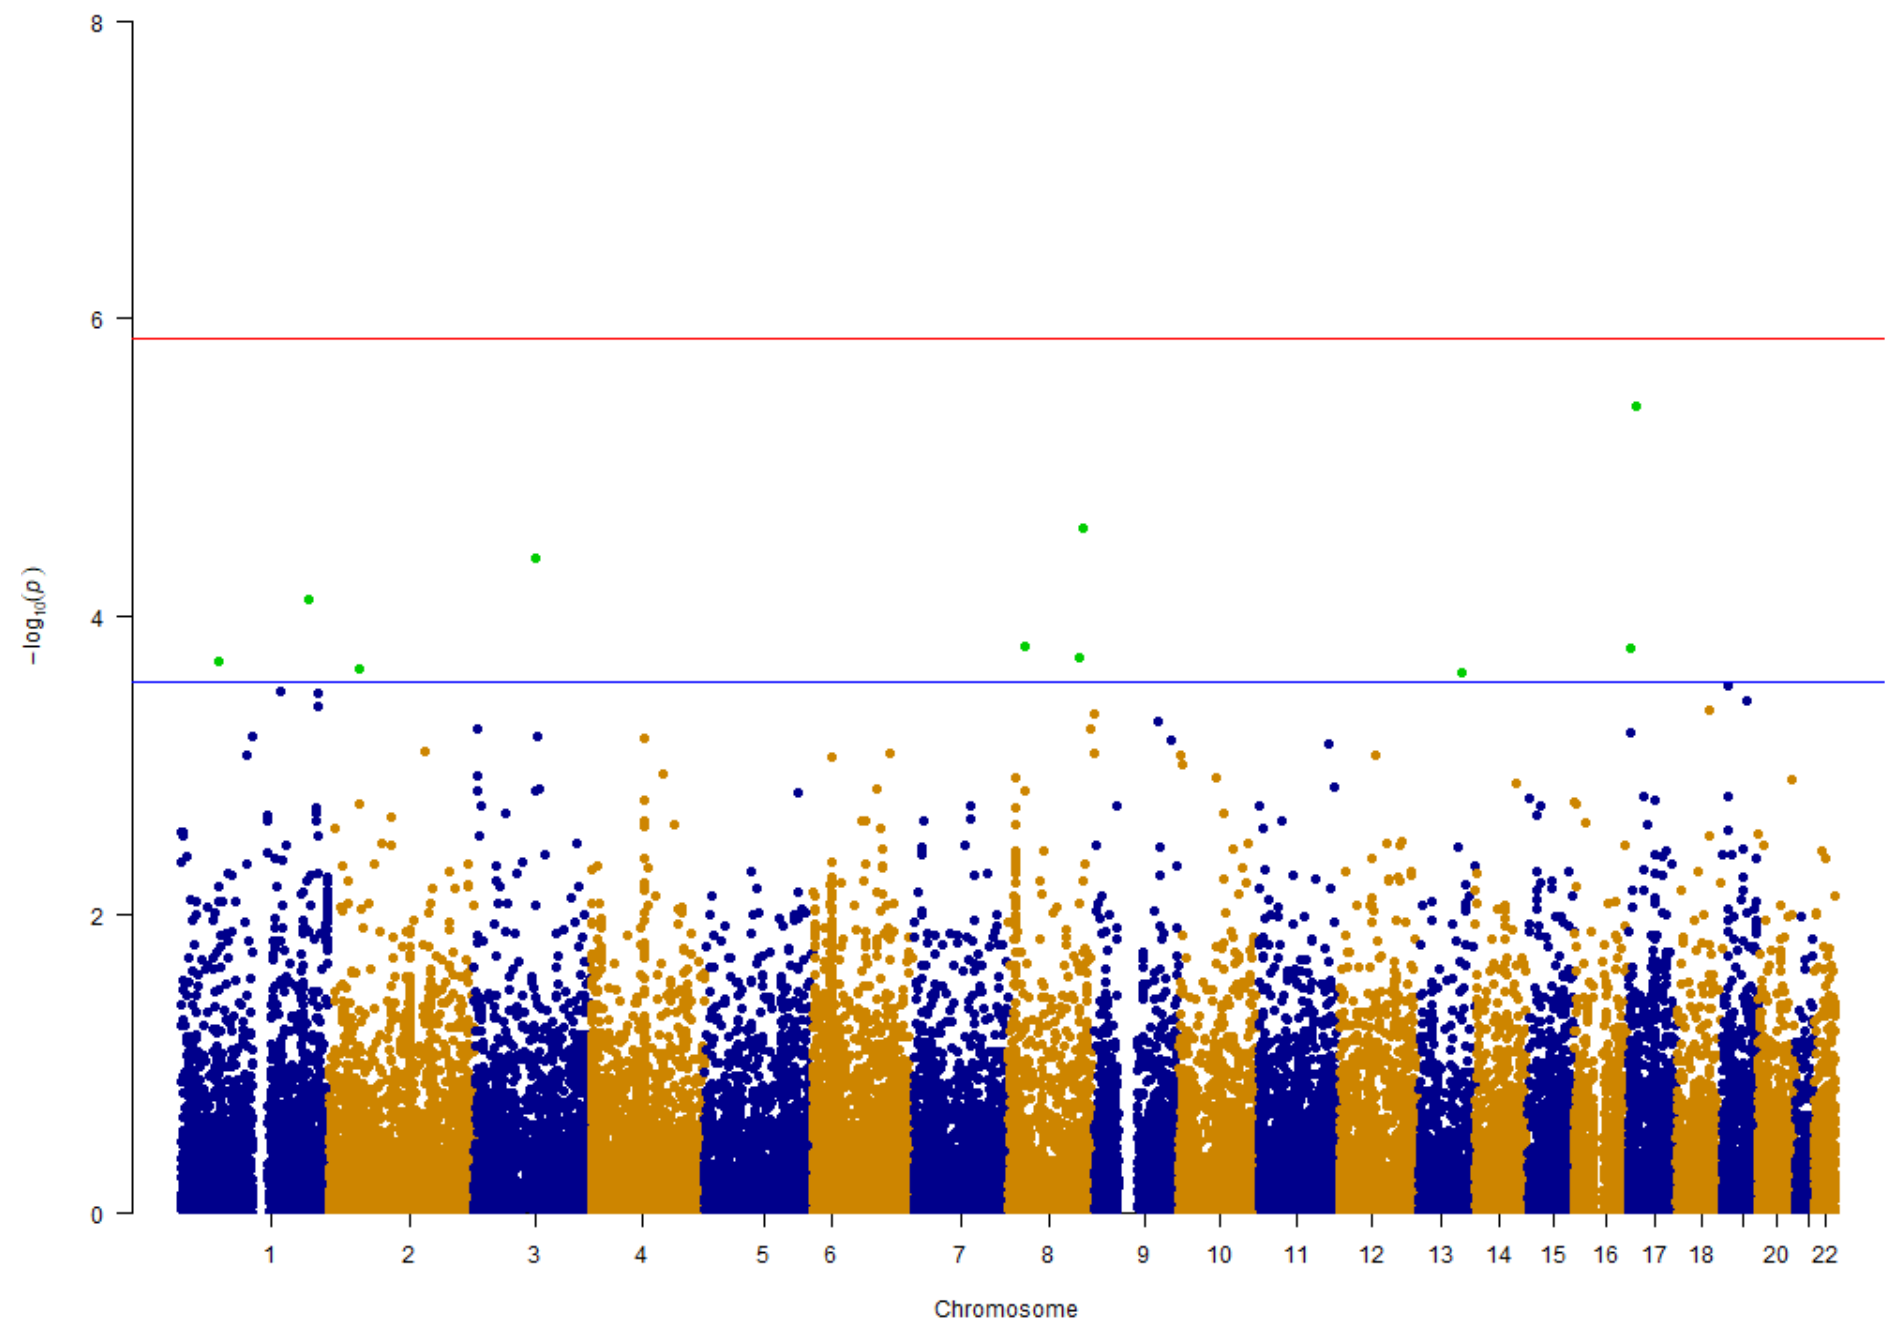

Supplement: f1 [file 2893662.f1.zip]

Q-Q plot of left putamen DaTscan EWAS

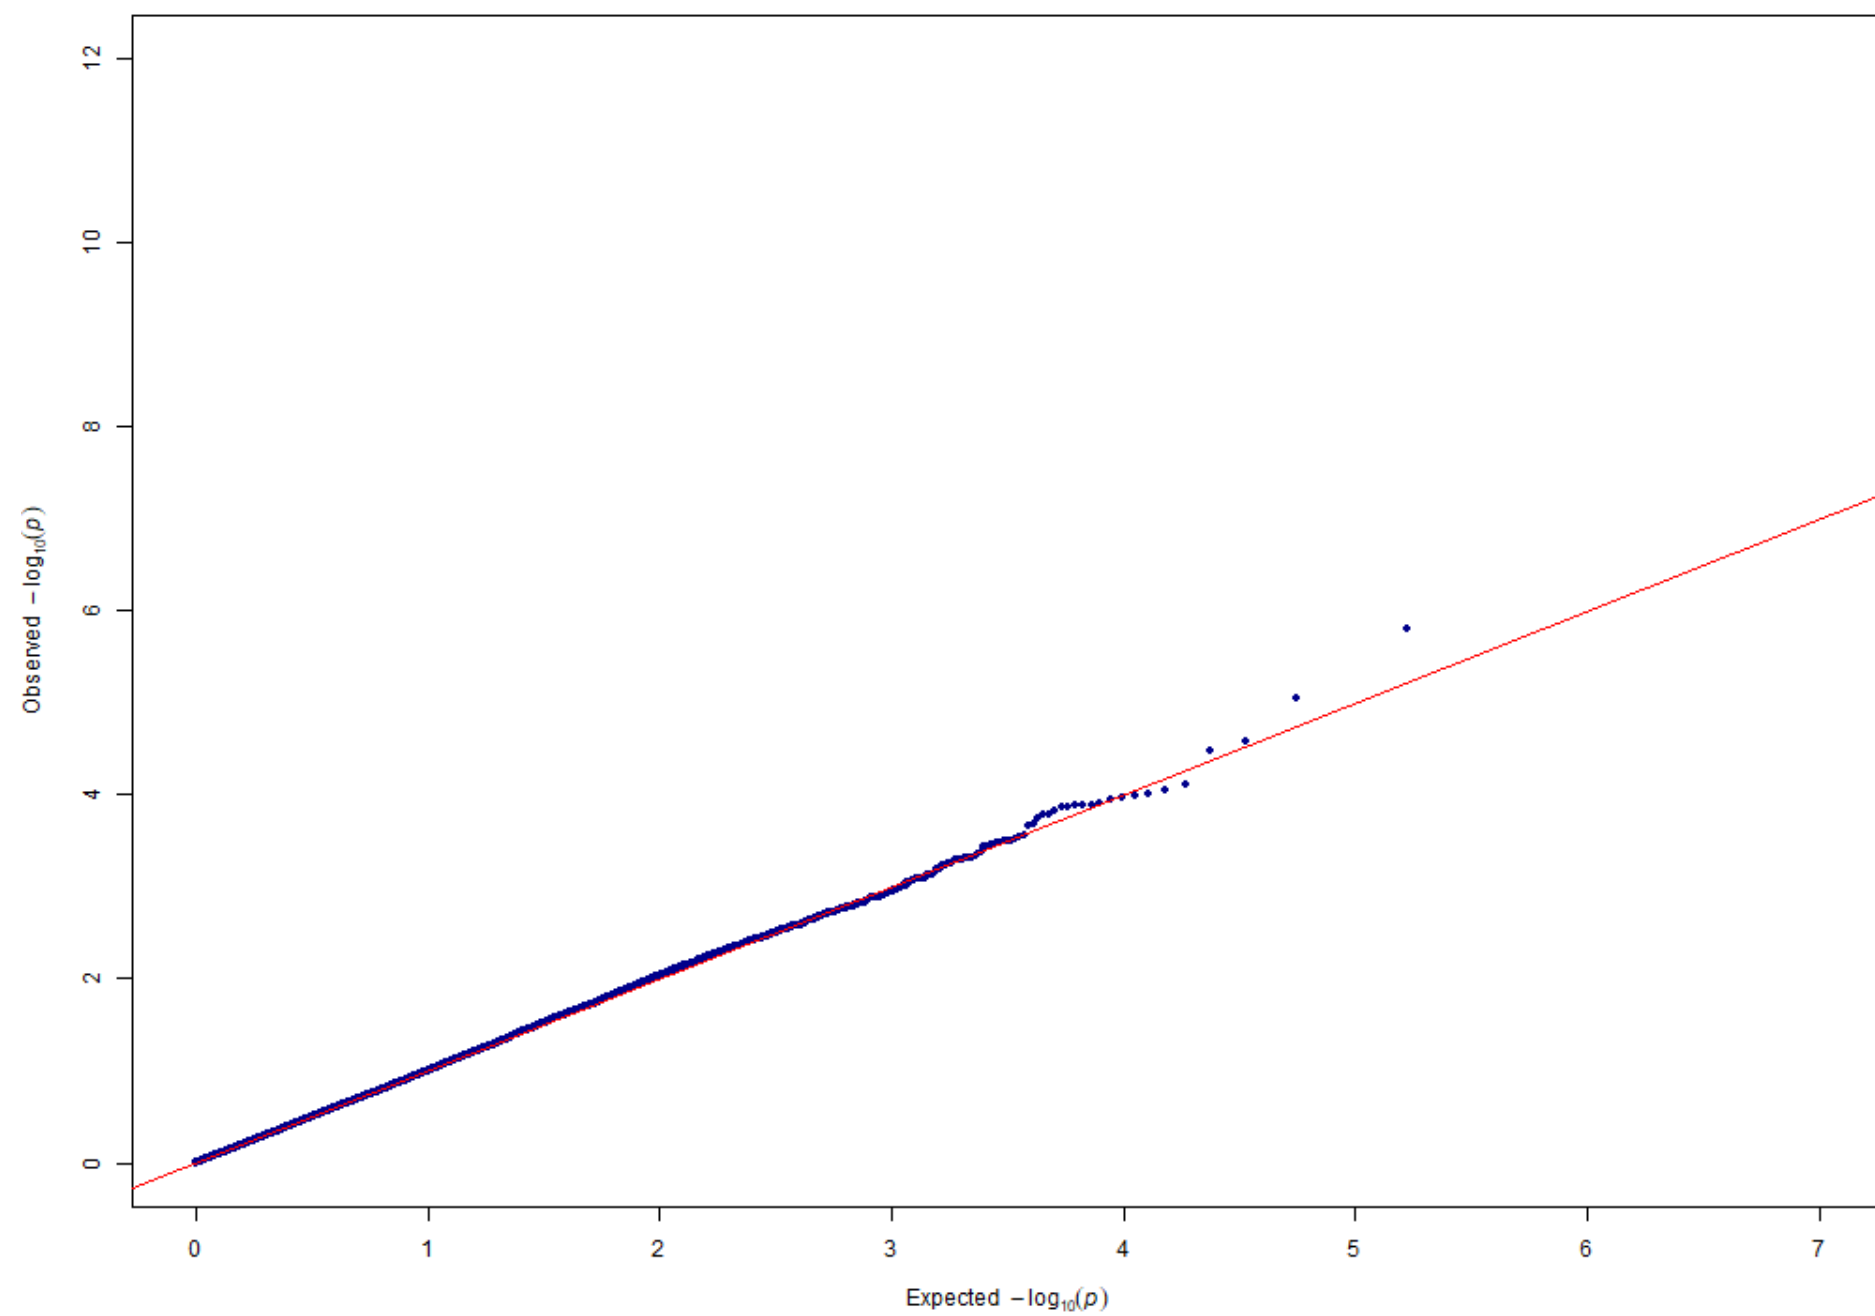

Supplement: f1 [file 2893662.f1.zip]

Q-Q plot of right anterior putamen DaTscan EWAS

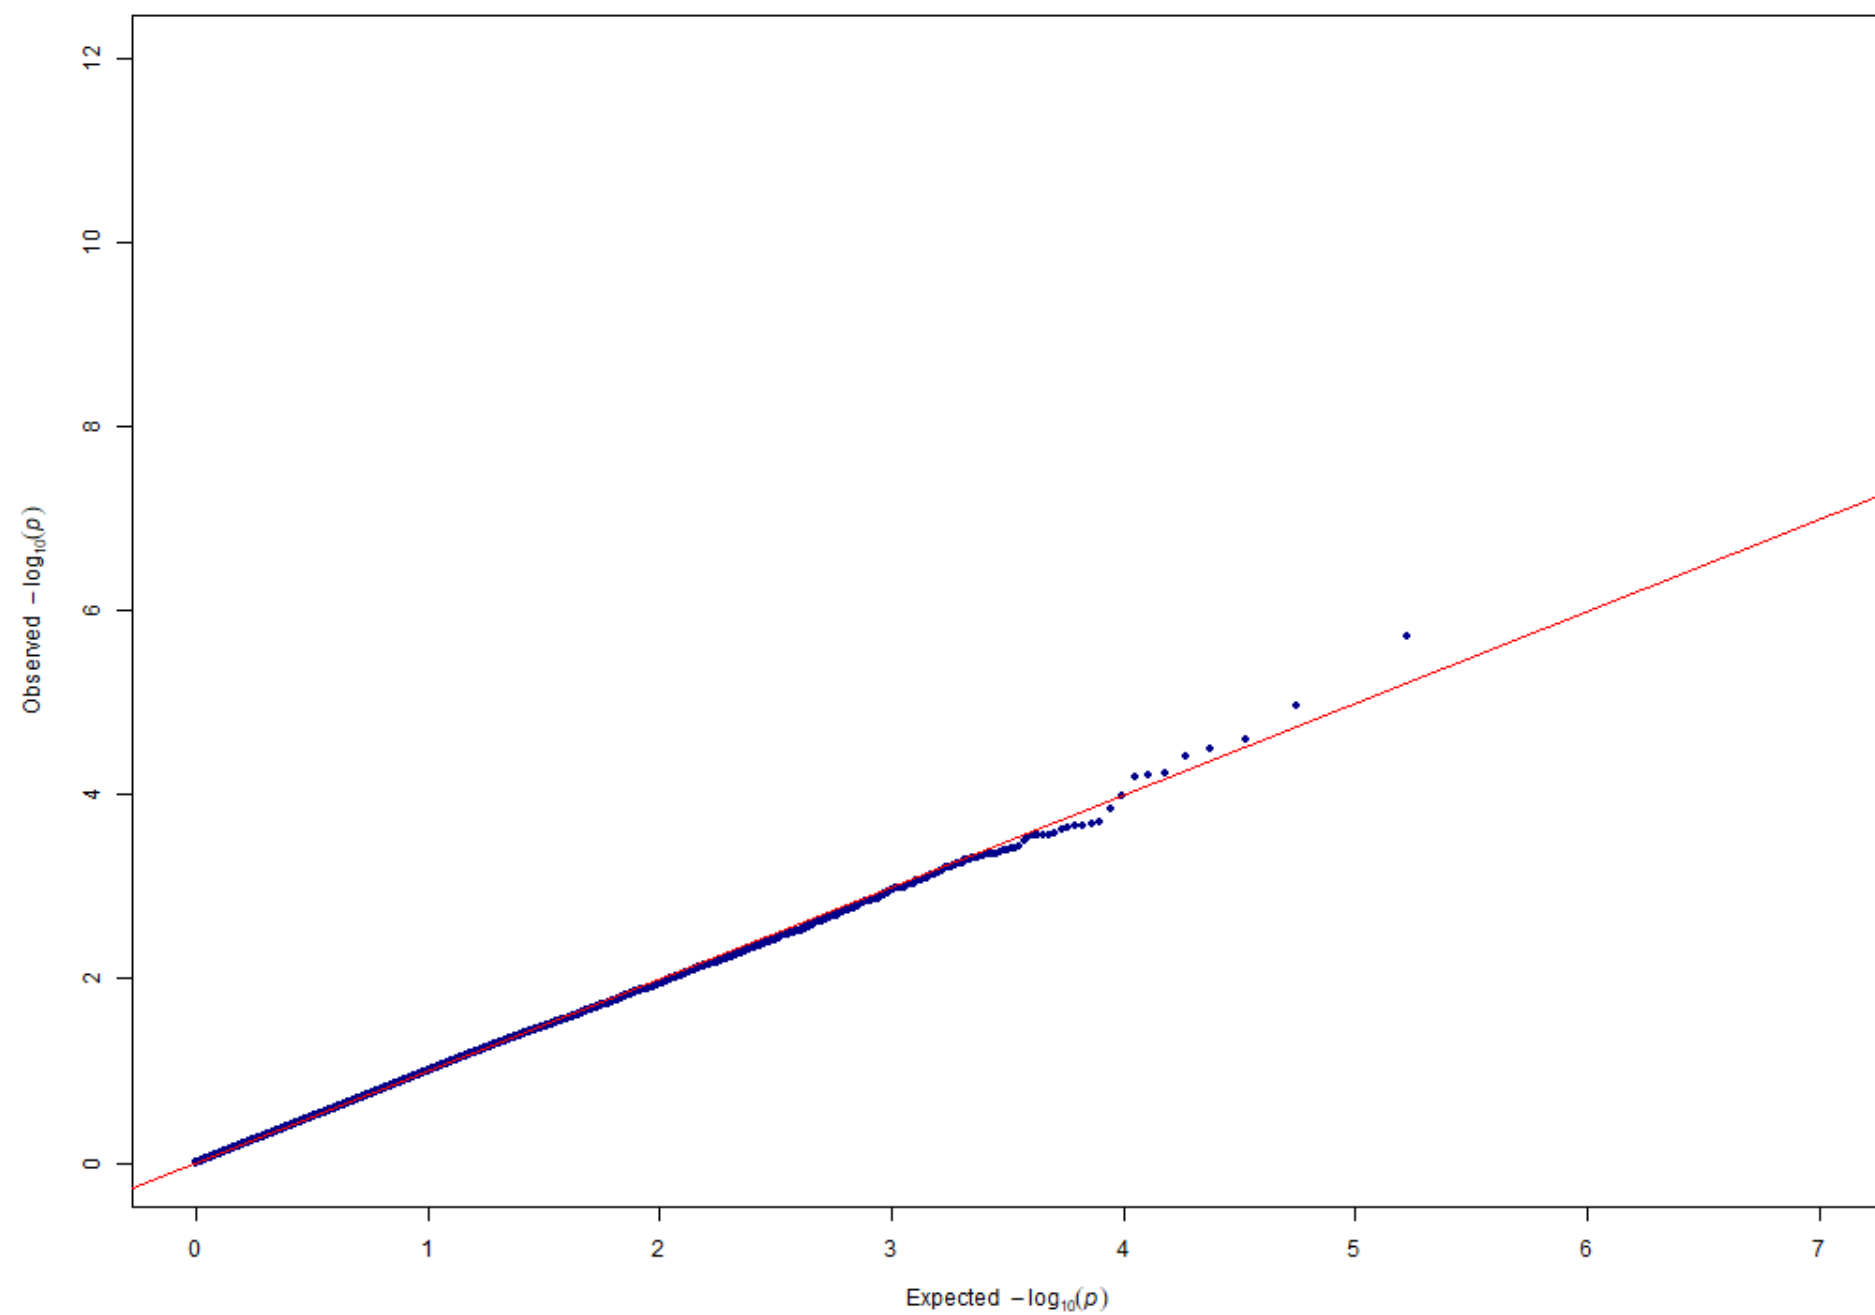

Supplement: f1 [file 2893662.f1.zip]

Q-Q plot of left putamen DaTscan GWAS

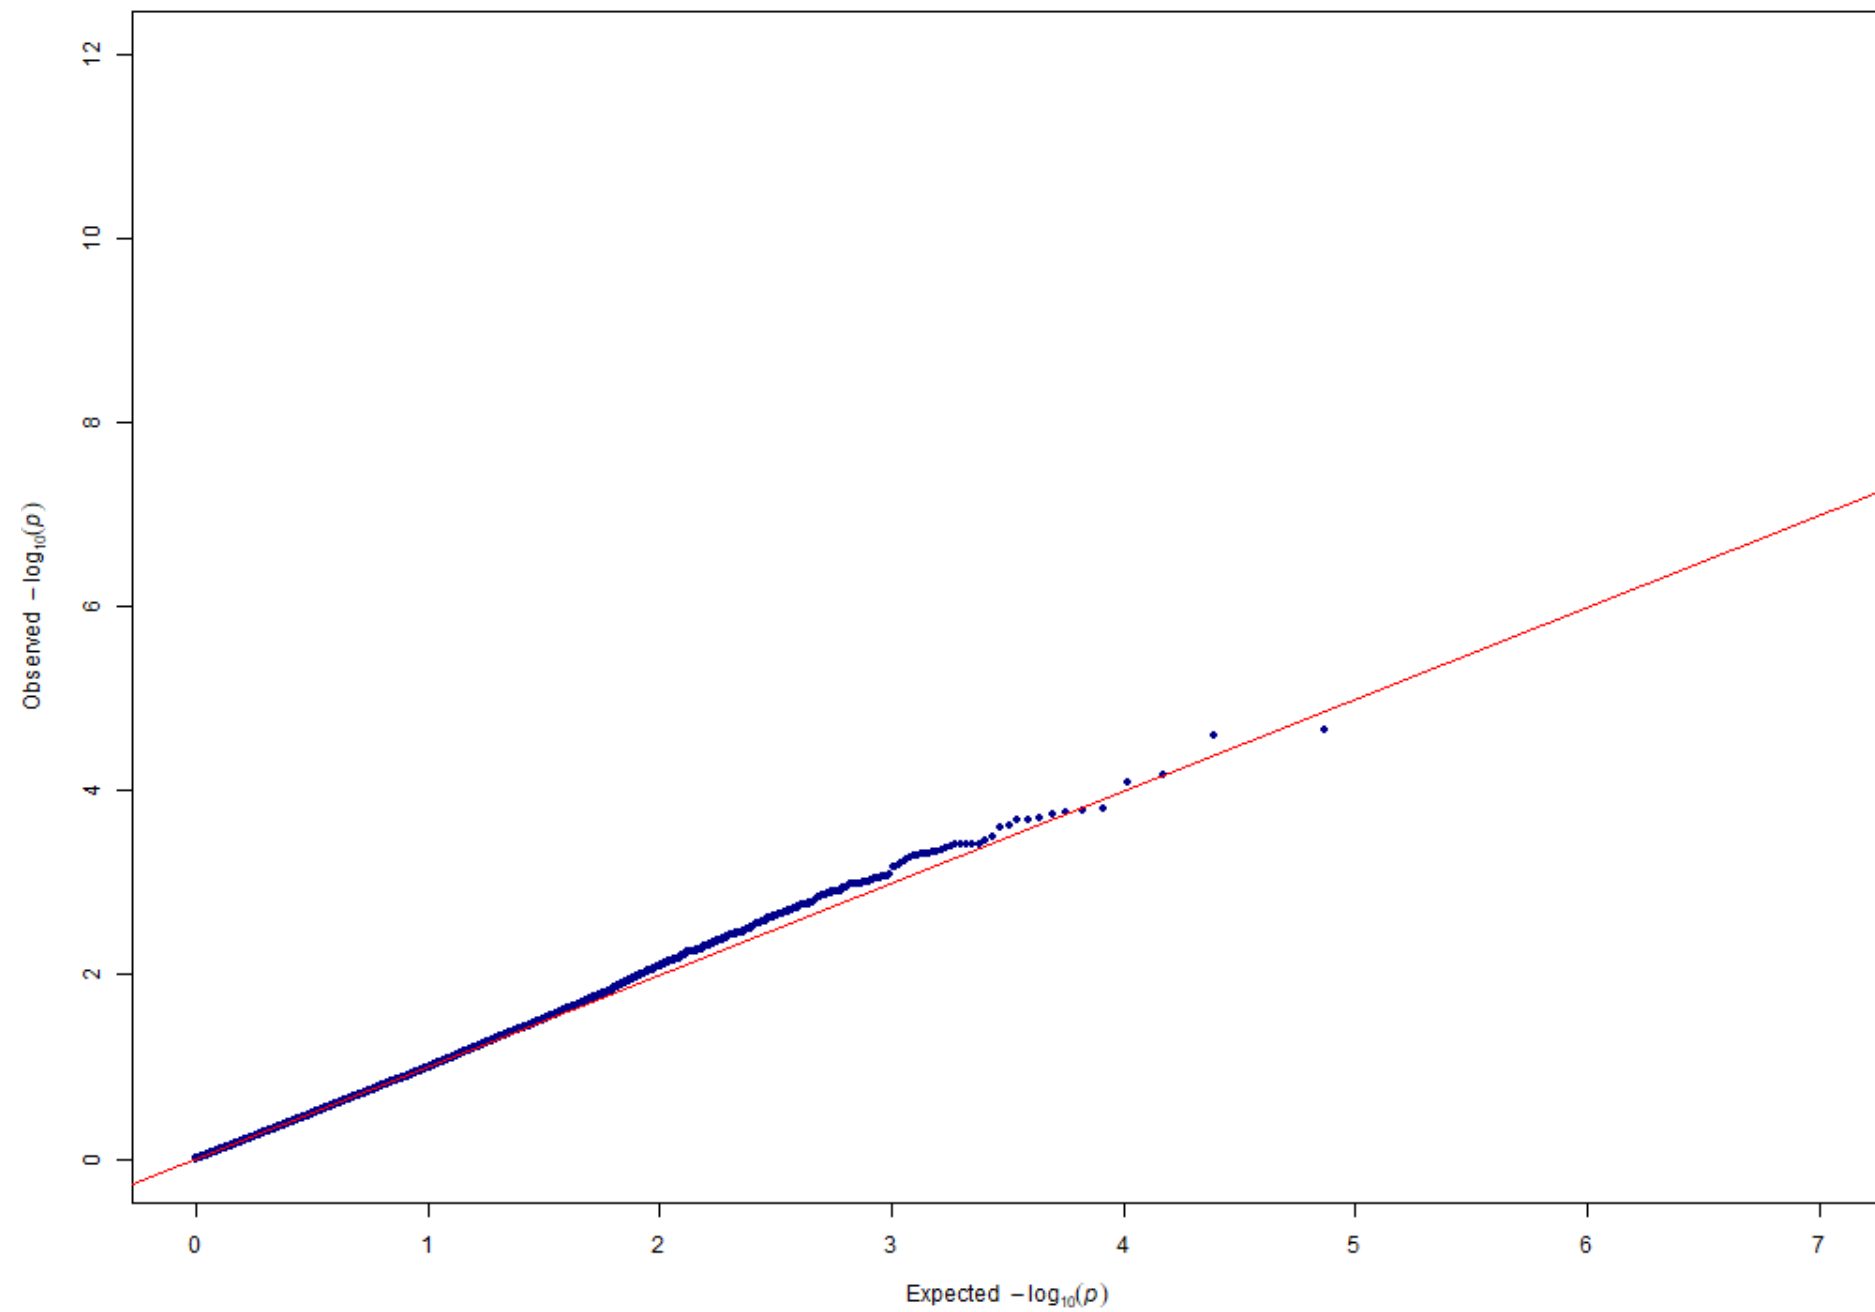

Supplement: f1 [file 2893662.f1.zip]
